# Supplementary material
Source: PubMed Central journal article supplement (PMC9617971)
Supplement: 41467_2022_33864_MOESM1_ESM.pdf [file 41467_2022_33864_MOESM1_ESM.pdf]

# 1 Supplementary Information

|    |                                 |    |
|----|---------------------------------|----|
| 2  |                                 |    |
| 3  | Supplementary Information ..... | 1  |
| 4  | Supplementary table 1.....      | 2  |
| 5  | Supplementary table 2.....      | 4  |
| 6  | Supplementary table 3.....      | 5  |
| 7  | Supplementary table 4.....      | 6  |
| 8  | Supplementary table 5.....      | 7  |
| 9  | Supplementary table 6.....      | 9  |
| 10 | Supplementary table 7.....      | 10 |
| 11 | Supplementary table 8.....      | 12 |
| 12 | Supplementary table 9.....      | 14 |
| 13 | Supplementary table 10.....     | 16 |
| 14 | Supplementary table 11.....     | 18 |
| 15 | Supplementary table 12.....     | 20 |
| 16 | Supplementary Figure 1.....     | 21 |
| 17 | Supplementary Figure 2.....     | 22 |
| 18 | Supplementary Figure 3.....     | 23 |
| 19 | Supplementary Figure 4.....     | 24 |
| 20 | Supplementary Figure 5.....     | 25 |
| 21 | Supplementary Figure 6.....     | 26 |
| 22 | Supplementary Figure 7.....     | 27 |
| 23 | Supplementary Figure 8.....     | 28 |
| 24 | Supplementary Figure 9.....     | 29 |
| 25 | Supplementary Figure 10.....    | 30 |
| 26 | Supplementary Figure 11.....    | 31 |
| 27 | References .....                | 32 |
| 28 |                                 |    |
| 29 |                                 |    |

30  
31  
32

## Supplementary table 1

Synopsis of 27 *in vitro* studies investigating the efficacy of pre-Alpha CCP against Omicron

| Reference                   | Assay type<br><br>(live virus =1<br>Pseudovirus=2) | Time mean or median (min-max) | (pre-Alpha CCP) WA-1 GMT <sub>50</sub> | (pre-Alpha CCP) BA.1 GMT <sub>50</sub> | (pre-Alpha CCP) fold drop vs. BA.1 | (pre-Alpha CCP) number in study | (pre-Alpha CCP) BA.1 neutralizing number | (pre-Alpha CCP) BA.1 neutralizing percent |
|-----------------------------|----------------------------------------------------|-------------------------------|----------------------------------------|----------------------------------------|------------------------------------|---------------------------------|------------------------------------------|-------------------------------------------|
| Zeng <sup>1</sup>           | 2                                                  | (1-2) mo                      | 1712                                   | 14                                     | 122                                | 9                               | 1                                        | 11                                        |
| Liu <sup>2</sup>            | 2                                                  | (9-120) days                  | 4344                                   | 135                                    | 32                                 | 10                              | 2                                        | 20                                        |
| Schmidt <sup>3</sup>        | 2                                                  | 1.2 mo                        | 2616                                   | 68                                     | 38                                 | 20                              | 19                                       | 95                                        |
| Schmidt <sup>3</sup>        | 2                                                  | 12 mo                         | 2037                                   | 136                                    | 15                                 | 20                              | 17                                       | 85                                        |
| Schmidt <sup>3</sup>        | 2                                                  | 6 mo                          | 1678                                   | 34                                     | 49                                 | 20                              | 13                                       | 65                                        |
| Arien <sup>4</sup>          | 1                                                  | 1 mo                          | 1086                                   | 50                                     | 22                                 | 10                              | 1                                        | 10                                        |
| Lusvarghi <sup>5</sup>      | 2                                                  | 30 (14-51) days               | 715                                    | 25                                     | 29                                 | 16                              | 2                                        | 13                                        |
| Hoffman <sup>6</sup>        | 2                                                  | < 2 mo                        | 614                                    | 8                                      | 77                                 | 17                              | 8                                        | 47                                        |
| Zou <sup>7</sup>            | 1                                                  | 1 mo                          | 601                                    | 38                                     | 16                                 | 64                              | 41                                       | 64                                        |
| Planas <sup>8</sup>         | 2                                                  | 6 mo                          | 569                                    | 28                                     | 20                                 | 16                              | 6                                        | 38                                        |
| Planas <sup>8</sup>         | 2                                                  | 12 mo                         | 580                                    | 29                                     | 20                                 | 23                              | 8                                        | 35                                        |
| Zhang <sup>9</sup>          | 2                                                  | (1-3) mo                      | 556                                    | 66                                     | 8                                  | 28                              | 28                                       | 100                                       |
| Gruell <sup>10</sup>        | 2                                                  | 1.5 mo                        | 494                                    | 6                                      | 82                                 | 30                              | 3                                        | 10                                        |
| Gruell <sup>10</sup>        | 2                                                  | 12 mo                         | 93                                     | 8                                      | 12                                 | 30                              | 9                                        | 30                                        |
| Dejnirattisai <sup>11</sup> | 1                                                  | 42 med days                   | 475                                    | 28                                     | 17                                 | 32                              | 32                                       | 100                                       |
| Sheward <sup>12</sup>       | 2                                                  | 1 mo                          | 350                                    | 40                                     | 9                                  | 34                              | 25                                       | 74                                        |

|                         |   |                 |      |    |    |     |     |       |
|-------------------------|---|-----------------|------|----|----|-----|-----|-------|
| Tada <sup>13</sup>      | 2 | (32-57)         | 233  | 9  | 26 | 10  | 4   | 40    |
| Aggerwal <sup>14</sup>  | 1 | 1+ mo           | 215  | 10 | 22 | 20  | 0   | 0     |
| Zhao <sup>15</sup>      | 2 | 18 (11-51) days | 193  | 11 | 17 | 16  | 1   | 6     |
| Bowen <sup>16</sup>     | 2 | (28-78) days    | 162  | 10 | 16 | 28  | 13  | 46    |
| Zou <sup>7</sup>        | 1 | 6 mo            | 142  | 32 | 4  | 36  | 30  | 83    |
| Carreno <sup>17</sup>   | 1 | 58 (23-87) days | 67   | 6  | 11 | 15  | 4   | 27    |
| Syed <sup>18</sup>      | 2 | <1 mo           | 80   | 20 | 4  | 8   | 6   | 75    |
| Bekliz <sup>19</sup>    | 1 | (3-137) days    | 37   | 1  | 45 | 34  | 5   | 15    |
| Haveri <sup>20</sup>    | 1 | 1 mo            | 32   | 2  | 16 | 13  | 0   | 0     |
| Li <sup>21</sup>        | 1 | <1 mo           | 28   | 2  | 14 | 108 | 22  | 22    |
| Kurahashi <sup>22</sup> | 1 | (1-3) mo        | 19   | 2  | 13 | 40  | 15  | 38    |
| GM (GMT <sub>50</sub> ) |   |                 | 1712 | 15 | 20 |     |     |       |
| Total (AVG%)            |   |                 |      |    |    | 707 | 315 | (45%) |

33

34 **Supplementary table 2**

35 Synopsis of 5 *in vitro* studies investigating the efficacy of Alpha CCP against Omicron

| Reference                   | Assay type<br>(live virus =1<br>Pseudovirus=2<br>) | Time<br>mean<br>or<br>media<br>n (min-<br>max) | (Alph<br>a<br>CCP)<br>WA-1<br>GMT <sub>50</sub> | (Alph<br>a<br>CCP)<br>BA.1<br>GMT <sub>50</sub> | (Alpha<br>CCP) fold<br>reductio<br>n vs.<br>BA.1 | (Alpha<br>CCP)<br>numbe<br>r | (Alpha<br>CCP) BA.1<br>neutralizin<br>g number | (Alpha<br>CCP) BA.1<br>neutralizin<br>g percent |
|-----------------------------|----------------------------------------------------|------------------------------------------------|-------------------------------------------------|-------------------------------------------------|--------------------------------------------------|------------------------------|------------------------------------------------|-------------------------------------------------|
| Lusvarghi <sup>5</sup>      | 2                                                  | 30 (14-<br>51)<br>days                         | 4978                                            | 30                                              | 166                                              | 4                            | 1                                              | 25                                              |
| Dejnirattisai <sup>11</sup> | 1                                                  | 19<br>med<br>days                              | 1313                                            | 39                                              | 34                                               | 18                           | 18                                             | 100                                             |
| Rosler <sup>23</sup>        | 1                                                  |                                                | 256                                             | 4                                               | 63                                               | 10                           | 0                                              | 0                                               |
| Haveri <sup>20</sup>        | 1                                                  | 1 mo                                           | 32                                              | 2                                               | 16                                               | 20                           | 0                                              | 0                                               |
| Bekliz <sup>19</sup>        | 1                                                  | 3-137<br>days                                  | 46                                              | 1                                               | 57                                               | 12                           | 2                                              | 17                                              |
| GM (GMT <sub>50</sub> )     |                                                    |                                                | 301                                             | 6                                               | 50                                               |                              |                                                |                                                 |
| Total<br>(AVG%)             |                                                    |                                                |                                                 |                                                 |                                                  | 64                           | 21                                             | (33%)                                           |

36

37

38 **Supplementary table 3**

39 Synopsis of 5 *in vitro* studies investigating the efficacy of Beta CCP against Omicron.

| reference                   | Assay type<br>(live virus =1<br>Pseudovirus=2<br>) | time<br>mean<br>or<br>media<br>n (min-<br>max) | (beta<br>CCP)<br>WA-1<br>GMT <sub>50</sub> | (beta<br>CCP)<br>BA.1<br>GMT <sub>50</sub> | (beta<br>CCP) fold<br>reductio<br>n vs.<br>BA.1 | (beta<br>CCP)<br>numbe<br>r | (beta CCP)<br>BA.1<br>neutralizin<br>g number | (beta CCP)<br>BA.1<br>neutralizin<br>g percent |
|-----------------------------|----------------------------------------------------|------------------------------------------------|--------------------------------------------|--------------------------------------------|-------------------------------------------------|-----------------------------|-----------------------------------------------|------------------------------------------------|
| Lusvarghi <sup>5</sup>      | 2                                                  | 30 (14-<br>51)<br>days                         | 439                                        | 191                                        | 2                                               | 2                           | 2                                             | 100                                            |
| Dejnirattisai <sup>11</sup> | 1                                                  | 61<br>med<br>days                              | 327                                        | 28                                         | 12                                              | 14                          | 14                                            | 100                                            |
| Rossler <sup>23</sup>       | 1                                                  |                                                | 128                                        | 4                                          | 32                                              | 8                           | 1                                             | 13                                             |
| Haveri <sup>20</sup>        | 1                                                  | 1 mo                                           | 16                                         | 2                                          | 8                                               | 5                           | 0                                             | 0                                              |
| Bekliz <sup>19</sup>        | 1                                                  | 3-137<br>days                                  | 21                                         | 1                                          | 23                                              | 8                           | 2                                             | 25                                             |
| GM (GMT <sub>50</sub> )     |                                                    |                                                | 140                                        | 8                                          | 11                                              |                             |                                               |                                                |
| Total<br>(AVG%)             |                                                    |                                                |                                            |                                            |                                                 | 37                          | 19                                            | (51%)                                          |

40

41 **Supplementary table 4**

42 Synopsis of 7 *in vitro* studies investigating the efficacy of Delta CCP against Omicron.

| Reference                   | Assay type<br>(live virus =1<br>Pseudovirus=2<br>) | Time<br>mean<br>or<br>media<br>n (min-<br>max) | (Delta<br>CCP)<br>WA-1<br>GMT <sub>50</sub> | (Delta<br>CCP)<br>BA.1<br>GMT <sub>50</sub> | (Delta<br>CCP)<br>fold<br>drop<br>vs.<br>BA.1 | (Delta<br>CCP)<br>numbe<br>r | (Delta CCP)<br>BA.1<br>neutralizin<br>g number | (Delta CCP)<br>BA.1<br>neutralizin<br>g percent |
|-----------------------------|----------------------------------------------------|------------------------------------------------|---------------------------------------------|---------------------------------------------|-----------------------------------------------|------------------------------|------------------------------------------------|-------------------------------------------------|
| Zeng <sup>1</sup>           | 2                                                  | (1-2)<br>mo                                    | 11200                                       | 3476                                        | 3                                             | 19                           | 10                                             | 53                                              |
| Lechmere <sup>24</sup>      | 2                                                  | (13-22)<br>days                                | 668                                         | 164                                         | 4                                             | 14                           | 12                                             | 86                                              |
| Lusvarghi <sup>5</sup>      | 2                                                  | 30 (14-<br>51)<br>days                         | 1211                                        | 18                                          | 66                                            | 15                           | 12                                             | 80                                              |
| Aggerwal <sup>14</sup>      | 1                                                  |                                                | 770                                         | 37                                          | 21                                            | 10                           | 9                                              | 90                                              |
| Rosler <sup>23</sup>        | 1                                                  |                                                | 192                                         | 8                                           | 25                                            | 7                            | 1                                              | 14                                              |
| Bekliz <sup>19</sup>        | 1                                                  | 3-137<br>days                                  | 73                                          | 3                                           | 24                                            | 10                           | 6                                              | 60                                              |
| Dejnirattisai <sup>11</sup> | 1                                                  | 38<br>med<br>dayas                             | 47                                          | 27                                          | 2                                             | 19                           | 19                                             | 100                                             |
| GM (GMT <sub>50</sub> )     |                                                    |                                                | 167                                         | 10                                          | 17                                            |                              |                                                |                                                 |
| Total (AVG%)                |                                                    |                                                |                                             |                                             |                                               | 94                           | 69                                             | (73%)                                           |

43

44 **Supplementary table 5**

45 Synopsis of 22 *in vitro* studies investigating the efficacy of plasma from uninfected recipients of 2

46 BNT162b2 doses against Omicron.

| reference                       | Assay type<br>(live virus =1<br>Pseudo virus=2) | time mean<br>or median<br>(min-max) | (2 dose<br>BNT162<br>b2<br>plasma)<br>WA-1<br>GMT <sub>50</sub> | (2 dose<br>BNT162<br>b2<br>plasma)<br>BA.1<br>GMT <sub>50</sub> | (2 dose<br>BNT162<br>b2<br>plasma)<br>fold<br>reductio<br>n vs.<br>BA.1 | (2 dose<br>BNT162<br>b2<br>plasma)<br>number | (2 dose<br>BNT162b<br>2 plasma)<br>BA.1<br>neutralizi<br>ng<br>number | (2 dose<br>BNT162b<br>2 plasma)<br>BA.1<br>neutralizi<br>ng<br>percent |
|---------------------------------|-------------------------------------------------|-------------------------------------|-----------------------------------------------------------------|-----------------------------------------------------------------|-------------------------------------------------------------------------|----------------------------------------------|-----------------------------------------------------------------------|------------------------------------------------------------------------|
| Schmidt <sup>3</sup>            | 2                                               | 1 mo                                | 7627                                                            | 92                                                              | 83                                                                      | 18                                           | 15                                                                    | 83                                                                     |
| Liu <sup>2</sup>                | 2                                               | (16-213)<br>days                    | 4669                                                            | 222                                                             | 21                                                                      | 13                                           | 6                                                                     | 46                                                                     |
| Zeng <sup>1</sup>               | 2                                               | (21-28) days                        | 2769                                                            | 121                                                             | 23                                                                      | 48                                           | 13                                                                    | 27                                                                     |
| Schmidt <sup>3</sup>            | 2                                               | 5 mo                                | 2435                                                            | 126                                                             | 19                                                                      | 18                                           | 15                                                                    | 83                                                                     |
| Dejnirattis<br>ai <sup>11</sup> | 1                                               | 1 mo                                | 1993                                                            | 19                                                              | 105                                                                     | 20                                           | 20                                                                    | 100                                                                    |
| Chatterjee <sup>25</sup>        | 2                                               | 4 mo                                | 1544                                                            | 935                                                             | 2                                                                       | 25                                           | 25                                                                    | 100                                                                    |
| Syed <sup>18</sup>              | 2                                               | 1-1.5 mo                            | 1280                                                            | 80                                                              | 16                                                                      | 21                                           | 14                                                                    | 67                                                                     |
| Tada <sup>13</sup>              | 2                                               | 90 days                             | 859                                                             | 25                                                              | 34                                                                      | 9                                            | 7                                                                     | 78                                                                     |
| Bowen <sup>16</sup>             | 2                                               | 9-20 days                           | 764                                                             | 28                                                              | 27                                                                      | 10                                           | 9                                                                     | 90                                                                     |
| Chatterjee <sup>25</sup>        | 2                                               | 1 mo                                | 641                                                             | 105                                                             | 6                                                                       | 19                                           | 10                                                                    | 53                                                                     |
| Hoffman <sup>6</sup>            | 2                                               | <3 mo                               | 604                                                             | 10                                                              | 60                                                                      | 11                                           | 1                                                                     | 9                                                                      |
| Lusvarghi <sup>5</sup>          | 2                                               | 30 (28-34)<br>days                  | 562                                                             | 22                                                              | 26                                                                      | 39                                           | 3                                                                     | 8                                                                      |
| Gruell <sup>10</sup>            | 2                                               | 1 mo                                | 546                                                             | 8                                                               | 68                                                                      | 30                                           | 10                                                                    | 33                                                                     |
| Rosler <sup>23</sup>            | 1                                               | 1 mo                                | 512                                                             | 24                                                              | 21                                                                      | 20                                           | 9                                                                     | 45                                                                     |
| Edara <sup>26</sup>             | 1                                               | (14-28) days                        | 384                                                             | 20                                                              | 19                                                                      | 13                                           | 2                                                                     | 15                                                                     |

|                         |   |                    |     |    |    |     |     |       |
|-------------------------|---|--------------------|-----|----|----|-----|-----|-------|
| Muik <sup>27</sup>      | 1 | 1 mo               | 368 | 6  | 61 | 25  | 8   | 32    |
| Cele <sup>28</sup>      | 1 | (10-48) days       | 263 | 12 | 22 | 8   | 5   | 83    |
| Bekliz <sup>19</sup>    | 1 | 1 mo               | 338 | 4  | 86 | 16  | 11  | 69    |
| Planas <sup>8</sup>     | 2 | 161 (138-176) days | 329 | 30 | 11 | 16  | 1   | 6     |
| Carreno <sup>17</sup>   | 1 | 18 (14-21) days    | 274 | 11 | 25 | 10  | 7   | 70    |
| Gruell <sup>10</sup>    | 2 | 5 mo               | 139 | 9  | 15 | 30  | 11  | 37    |
| Wilheim <sup>29</sup>   | 1 | 6 mo               | 6   | 1  | 6  | 15  | 0   | 0     |
| GM (GMT <sub>50</sub> ) |   |                    | 628 | 27 | 24 |     |     |       |
| Total (AVG%)            |   |                    |     |    |    | 432 | 202 | (47%) |

47



48 **Supplementary table 6**

49 Synopsis of 9 *in vitro* studies investigating the efficacy of plasma from uninfected recipients of 2 mRNA-  
 50 1273 doses against Omicron.

| Reference                  | Assay type<br>(live virus =1<br>Pseudovirus=2<br>) | Time<br>mean<br>or<br>media<br>n (min-<br>max) | (2 dose<br>mRNA-<br>1273<br>plasma<br>) WA-1<br>GMT <sub>50</sub> | (2 dose<br>mRNA-<br>1273<br>plasma<br>) BA.1<br>GMT <sub>50</sub> | (2 dose<br>mRNA-<br>1273<br>plasma<br>) fold<br>drop<br>vs.<br>BA.1 | (2 dose<br>mRNA-<br>1273<br>plasma<br>)<br>numbe<br>r | (2 dose<br>mRNA-<br>1273<br>plasma)<br>BA.1<br>neutralizin<br>g number | (2 dose<br>mRNA-<br>1273<br>plasma)<br>BA.1<br>neutralizin<br>g percent |
|----------------------------|----------------------------------------------------|------------------------------------------------|-------------------------------------------------------------------|-------------------------------------------------------------------|---------------------------------------------------------------------|-------------------------------------------------------|------------------------------------------------------------------------|-------------------------------------------------------------------------|
| Doria-Rose <sup>30</sup>   | 2                                                  | 1 mo                                           | 3016                                                              | 62                                                                | 49                                                                  | 30                                                    | 22                                                                     | 73                                                                      |
| Syed <sup>18</sup>         | 2                                                  | 1-1.5<br>mo                                    | 2560                                                              | 320                                                               | 8                                                                   | 10                                                    | 8                                                                      | 80                                                                      |
| Doria-Rose <sup>30</sup>   | 2                                                  | 1 mo                                           | 2269                                                              | 27                                                                | 84                                                                  | 30                                                    | 22                                                                     | 73                                                                      |
| Bowen <sup>16</sup>        | 2                                                  | 6-15<br>days                                   | 1155                                                              | 26                                                                | 44                                                                  | 11                                                    | 9                                                                      | 82                                                                      |
| Tada <sup>13</sup>         | 2                                                  | 80<br>days                                     | 999                                                               | 38                                                                | 26                                                                  | 8                                                     | 5                                                                      | 63                                                                      |
| Edara <sup>26</sup>        | 1                                                  | 1 mo                                           | 745                                                               | 15                                                                | 50                                                                  | 11                                                    | 4                                                                      | 36                                                                      |
| Carreno <sup>17</sup>      | 1                                                  | 26 (14-<br>36)<br>days                         | 581                                                               | 14                                                                | 42                                                                  | 10                                                    | 10                                                                     | 100                                                                     |
| Rosler <sup>23</sup>       | 1                                                  | 5 mo                                           | 384                                                               | 8                                                                 | 48                                                                  | 10                                                    | 1                                                                      | 10                                                                      |
| Wilhelm <sup>29</sup>      | 1                                                  | 6 mo                                           | 10                                                                | 1                                                                 | 20                                                                  | 14                                                    | 0                                                                      | 0                                                                       |
| GM<br>(GMT <sub>50</sub> ) |                                                    |                                                | 644                                                               | 21                                                                | 31                                                                  |                                                       |                                                                        |                                                                         |
| Total<br>(AVG%)            |                                                    |                                                |                                                                   |                                                                   |                                                                     | 134                                                   | 81                                                                     | (60%)                                                                   |

51

52 **Supplementary table 7**

53 Synopsis of 17 *in vitro* studies investigating the efficacy of plasma from infected and vaccinated (2  
 54 BNT162b2 doses) subjects (Vax-CCP) against Omicron.

| Reference                   | Assay type<br><br>(live virus =1<br>Pseudovirus=2) | Time mean or median (min-max) | (post-COVID-19/full vacc plasma) WA-1 GMT <sub>50</sub> | (post-COVID-19/full vacc plasma) BA.1 GMT <sub>50</sub> | (post-COVID-19/full vacc plasma) fold drop vs. BA.1 | (post-COVID-19/full vacc plasma) number | (post-COVID-19/full vacc plasma) BA.1 neutralizing number | (post-COVID-19/full vacc plasma) BA.1 neutralizing percent |
|-----------------------------|----------------------------------------------------|-------------------------------|---------------------------------------------------------|---------------------------------------------------------|-----------------------------------------------------|-----------------------------------------|-----------------------------------------------------------|------------------------------------------------------------|
| Schmidt <sup>3</sup>        | 2                                                  | 1 mo                          | 388872                                                  | 8106                                                    | 48                                                  | 17                                      | 17                                                        | 100                                                        |
| Planas <sup>8</sup>         | 2                                                  | 32 (21-48) days               | 78162                                                   | 1475                                                    | 53                                                  | 22                                      | 22                                                        | 100                                                        |
| Tada <sup>13</sup>          | 2                                                  | 1 mo                          | 14868                                                   | 921                                                     | 16                                                  | 7                                       | 7                                                         | 100                                                        |
| Cele <sup>28</sup>          | 1                                                  | (18-63)                       | 6763                                                    | 305                                                     | 22                                                  | 13                                      | 13                                                        | 100                                                        |
| Kawoaka <sup>31</sup>       | 1                                                  | 1 mo                          | 10002                                                   | 2029                                                    | 5                                                   | 13                                      | 13                                                        | 100                                                        |
| Kawoaka <sup>31</sup>       | 1                                                  | 3 mo                          | 2251                                                    | 399                                                     | 6                                                   | 13                                      | 13                                                        | 100                                                        |
| Gruell <sup>10</sup>        | 2                                                  | 1.5 mo                        | 7997                                                    | 1599                                                    | 5                                                   | 30                                      | 30                                                        | 100                                                        |
| Arien <sup>4</sup>          | 1                                                  |                               | 4822                                                    | 236                                                     | 20                                                  | 10                                      | 10                                                        | 100                                                        |
| Carreno <sup>17</sup>       | 1                                                  | 26 (15-39) days               | 2000                                                    | 146                                                     | 14                                                  | 10                                      | 10                                                        | 100                                                        |
| Dejnirattisai <sup>11</sup> | 1                                                  | 1 mo                          | 1899                                                    | 215                                                     | 9                                                   | 17                                      | 17                                                        | 100                                                        |
| LJ <sup>21</sup>            | 1                                                  | < 1 mo                        | 1598                                                    | 80                                                      | 20                                                  | 20                                      | 20                                                        | 100                                                        |
| Bekliz <sup>19</sup>        | 1                                                  | 1 mo                          | 1190                                                    | 65                                                      | 18                                                  | 6                                       | 6                                                         | 100                                                        |
| Haveri <sup>20</sup>        | 1                                                  | 1 mo                          | 1024                                                    | 32                                                      | 32                                                  | 33                                      | 33                                                        | 100                                                        |
| Rosler <sup>23</sup>        | 1                                                  |                               | 1024                                                    | 256                                                     | 4                                                   | 5                                       | 5                                                         | 100                                                        |
| Edara <sup>26</sup>         | 1                                                  | 6 mo                          | 625                                                     | 31                                                      | 20                                                  | 24                                      | 15                                                        | 63                                                         |

|                         |   |                  |      |     |    |     |     |       |
|-------------------------|---|------------------|------|-----|----|-----|-----|-------|
| Kurahashi <sup>22</sup> | 1 | 1 mo             | 21   | 2   | 14 | 19  | 7   | 37    |
| Wilheim <sup>29</sup>   | 1 | (.07-<br>7.6) mo | 100  | 10  | 10 | 20  | 5   | 25    |
| GM (GMT <sub>50</sub> ) |   |                  | 2753 | 192 | 14 |     |     |       |
| Total (AVG%)            |   |                  |      |     |    | 279 | 243 | (87%) |

55

56 **Supplementary table 8**57 Synopsis of 17 *in vitro* studies investigating the efficacy of plasma from uninfected subjects vaccinated  
58 with 3 BNT162b2 doses against Omicron.

| Reference                   | Assay type<br>(live virus =1<br>Pseudovirus=2) | Time mean or median (min-max) | (3 dose BNT162b2 plasma) WA-1 GMT <sub>50</sub> | (3 dose BNT162b2 plasma) BA.1 GMT <sub>50</sub> | (3 dose BNT162b2 plasma) fold drop vs. BA.1 | (3 dose BNT162b2 plasma) number | (3 dose BNT162b2 plasma) BA.1 neutralizing number | (3 dose BNT162b2 plasma) BA.1 neutralizing percent |
|-----------------------------|------------------------------------------------|-------------------------------|-------------------------------------------------|-------------------------------------------------|---------------------------------------------|---------------------------------|---------------------------------------------------|----------------------------------------------------|
| Schmidt <sup>3</sup>        | 2                                              | 1 mo                          | 65617                                           | 3871                                            | 17                                          | 18                              | 18                                                | 100                                                |
| Planas <sup>8</sup>         | 2                                              | 33 (8-61) days                | 12739                                           | 722                                             | 18                                          | 20                              | 20                                                | 100                                                |
| Zeng <sup>1</sup>           | 2                                              | (21-28) days                  | 10412                                           | 3179                                            | 3                                           | 23                              | 20                                                | 87                                                 |
| Dejnirattisai <sup>11</sup> | 1                                              | 1 mo                          | 9219                                            | 649                                             | 14                                          | 20                              | 20                                                | 100                                                |
| Gruell <sup>10</sup>        | 2                                              | 1 mo                          | 6241                                            | 1248                                            | 5                                           | 30                              | 30                                                | 100                                                |
| Lusvarghi <sup>5</sup>      | 2                                              | 43 (7-93) days                | 5029                                            | 718                                             | 7                                           | 39                              | 39                                                | 100                                                |
| Tada <sup>13</sup>          | 2                                              | 1 mo                          | 4892                                            | 360                                             | 14                                          | 12                              | 12                                                | 100                                                |
| Liu <sup>2</sup>            | 2                                              | (14-90) days                  | 4673                                            | 715                                             | 7                                           | 15                              | 15                                                | 100                                                |
| Kawoaka <sup>31</sup>       | 1                                              | 1 mo                          | 2866                                            | 485                                             | 6                                           | 10                              | 10                                                | 100                                                |
| Arien <sup>4</sup>          | 1                                              |                               | 2157                                            | 165                                             | 13                                          | 10                              | 10                                                | 100                                                |
| Hoffman <sup>6</sup>        | 2                                              | <1 mo                         | 2006                                            | 305                                             | 7                                           | 10                              | 9                                                 | 90                                                 |
| Edara <sup>26</sup>         | 1                                              | (17-28) days                  | 1247                                            | 89                                              | 14                                          | 35                              | 31                                                | 89                                                 |

|                         |   |                               |      |     |    |     |     |       |
|-------------------------|---|-------------------------------|------|-----|----|-----|-----|-------|
| Carreno <sup>17</sup>   | 1 | 19 (14-28) days               | 710  | 94  | 8  | 10  | 10  | 100   |
| Syed <sup>18</sup>      | 2 | 1-1.5 mo                      | 960  | 160 | 6  | 8   | 8   | 100   |
| Muik <sup>27</sup>      | 1 | 1 mo                          | 673  | 106 | 6  | 28  | 27  | 96    |
| Haveri <sup>20</sup>    | 1 | (21-42) days                  | 256  | 16  | 16 | 7   | 7   | 100   |
| Wilheim <sup>29</sup>   | 1 | 3 mo                          | 100  | 10  | 10 | 15  | 0   | 0     |
| GM (GMT <sub>50</sub> ) |   | time mean or median (min-max) | 2588 | 290 | 9  |     |     |       |
| Total (AVG%)            |   |                               |      |     |    | 310 | 286 | (92%) |

60 **Supplementary table 9**

61 Synopsis of *in vitro* studies investigating the efficacy of plasma from uninfected subjects vaccinated with  
 62 3 doses of mRNA-1273, AZD-1222 or Ad26.COVID against BA.1. Because of diversity of vaccines the  
 63 geomeans and sums were not computed.

64

| Reference                   | Vaccine type             | WA-1 GMT <sub>50</sub> | Fold drop vs. BA.1 | BA.1 GMT <sub>50</sub> | Number | BA.1 neutralizing number | BA.1 neutralizing percent |
|-----------------------------|--------------------------|------------------------|--------------------|------------------------|--------|--------------------------|---------------------------|
| Careno <sup>17</sup>        | COVID19 + mRNA-1273      | 3000                   | 11                 | 272                    | 10     | 10                       | 100                       |
| Edara <sup>26</sup>         | COVID19 + mRNA-1273 6 mo | 931                    | 25                 | 38                     | 13     | 9                        | 69                        |
| Careno <sup>17</sup>        | 3 dose mRNA-1273         | 1000                   | 17                 | 60                     | 10     | 10                       | 100                       |
| Doria-Rose <sup>30</sup>    | 3 dose mRNA-1273         | 8457                   | 4                  | 2002                   | 30     | 30                       | 100                       |
| Doria-Rose <sup>30</sup>    | 3 dose mRNA-1273         | 4216                   | 6                  | 650                    | 30     | 30                       | 100                       |
| Edara <sup>26</sup>         | 3 dose mRNA-1273         | 1395                   | 15                 | 96                     | 17     | 16                       | 94                        |
| Dejnirattisai <sup>32</sup> | AZD1222                  | 390                    | 19                 | 21                     | 41     | 41                       | 100                       |
| Rosler <sup>23</sup>        | AZD1222                  | 250                    | 25                 | 10.0                   | 20     | 0                        | 0                         |
| Planas <sup>8</sup>         | AZD1222 5 mo             | 187                    | 18                 | 10                     | 18     | 2                        | 10                        |
| Syed <sup>18</sup>          | Ad26.COVID               | 28                     | 1                  | 20.0                   | 9      | 2                        | 22                        |
| Schmidt <sup>3</sup>        | Ad26.COVID 1 mo          | 588                    | 24                 | 25                     | 19     | 2                        | 11                        |

|                      |                   |     |    |    |    |    |    |
|----------------------|-------------------|-----|----|----|----|----|----|
| Schmidt <sup>3</sup> | Ad26.COV2<br>6 mo | 982 | 23 | 43 | 19 | 11 | 58 |
|----------------------|-------------------|-----|----|----|----|----|----|

65

66  
67  
68

## Supplementary table 10

Synopsis of *in vitro* studies investigating the efficacy of plasma from (pre-omicron, BA.1 and BA.4/5 CCP) subjects against Omicron BA.1, BA.2 and BA.4/5.

| Reference               | Assay type<br>(live virus =1<br>Pseudovirus =2) | Time mean or median (min-max) | WA-1 nAb GMT <sub>50</sub> | Omicron BA.1 nAb GMT <sub>50</sub><br>(Fold reduction from WA-1) | Omicron BA.2 nAb GMT <sub>50</sub><br>(Fold reduction from WA-1) | Omicron BA.14/5 nAb GMT <sub>50</sub><br>(Fold reduction from WA-1) | Number in study | BA.1; BA.2; BA.4/5 neutralizing number | BA.1; BA.2; BA.4/5 neutralizing percent |
|-------------------------|-------------------------------------------------|-------------------------------|----------------------------|------------------------------------------------------------------|------------------------------------------------------------------|---------------------------------------------------------------------|-----------------|----------------------------------------|-----------------------------------------|
| Preomicron              |                                                 |                               |                            |                                                                  |                                                                  |                                                                     |                 |                                        |                                         |
| Wang <sup>33</sup>      | 1                                               | (7-213) days                  | 5185                       | 845 (6 FR)                                                       | 939 (6 FR)                                                       | 596 (9 FR)                                                          | 22              | 22; 22;22                              | 100;100 ; 100                           |
| Awasthi <sup>34</sup>   | 2                                               | >1 mo                         | 130                        | 13 (10 FR)                                                       | 12 (11 FR)                                                       | 13 (13 FR)                                                          | 10              | 1; 1; 1                                | 10; 10; 10                              |
| Qu <sup>35</sup>        | 2                                               | 3 day post hosp.              | 3554                       | 214 (17 FR)                                                      | 205                                                              | 717 (5 FR)                                                          | 18              | 12; 14; 17                             | 67; 78; 94                              |
| GM (GMT <sub>50</sub> ) |                                                 |                               | 1338                       | 133 (10 FR)                                                      | 132 (10 FR)                                                      | 177 (8 FR)                                                          |                 |                                        |                                         |
| Total (AVG%)            |                                                 |                               |                            |                                                                  |                                                                  |                                                                     | 50              | 35; 37;40                              | (70;74; 80)                             |
| BA.1                    |                                                 |                               |                            |                                                                  |                                                                  |                                                                     |                 |                                        |                                         |
| Khan <sup>36</sup>      | 1                                               | 23 (19-27iqr)                 | Not done                   | 275                                                              | Not done                                                         | 36                                                                  | 24              | 24; nd; 18                             | 100;nd; 75                              |
| Zou <sup>7</sup>        | 1                                               | 25 (13-62) days               | 16                         | 445 (0.04 FR)                                                    | 107 (0.15 FR)                                                    | Not done                                                            | 20              | 20; 19; nd                             | 100;95; nd                              |



|                           |   |                     |     |               |               |             |    |            |              |
|---------------------------|---|---------------------|-----|---------------|---------------|-------------|----|------------|--------------|
| Qu <sup>35</sup>          | 2 | 1-8 days post hosp. | 317 | 399 (0.8 FR)  | 304 (1.04 FR) | 189 (2 FR)  | 30 | 22; 21; 23 | 73;70;77     |
| GM (GMT <sub>50</sub> )   |   |                     | 71  | 366 (0.16 FR) | 180 (0.4 FR)  | 82 (1 FR)   | 74 |            |              |
| Total (AVG%)              |   |                     |     |               |               |             |    | 66;40;41   | 89;80;93     |
| BA.4/5                    |   |                     |     |               |               |             |    |            |              |
| Richards on <sup>37</sup> | 2 | < 9 days into hosp. | 904 | 557 (2 FR)    | 884 (1 FR)    | 1047 (1 FR) | 13 | 13;13;13   | 100;100; 100 |

69

70 **Supplementary table 11**

71 Synopsis of *in vitro* studies investigating the efficacy of plasma from (post-COVID-19-BA.1/full vacc  
 72 plasma) subjects (Vax-CCP) against Omicron BA.1, BA.2 and BA.4/5.

| reference                    | Assay type<br>(live virus =1<br>Pseudovirus=<br>2) | time<br>mean<br>or<br>media<br>n<br>(min-<br>max) | WA-1<br>nAb<br>GMT <sub>50</sub> | Omicro<br>n BA.1<br>nAb<br>GMT <sub>50</sub><br><br>(Fold<br>reductio<br>n from<br>WA-1) | Omicro<br>n BA.2<br>nAb<br>GMT <sub>50</sub><br><br>(Fold<br>reductio<br>n from<br>WA-1) | Omicro<br>n<br>BA.14/5<br>nAb<br>GMT <sub>50</sub><br><br>(Fold<br>reductio<br>n from<br>WA-1) | Number<br>in<br>study | BA.1;<br>BA.2;<br>BA.4/5<br><br>neutralizi<br>ng<br>number | BA.1;<br>BA.2;<br>BA.4/5<br><br>neutralizi<br>ng<br>percent |
|------------------------------|----------------------------------------------------|---------------------------------------------------|----------------------------------|------------------------------------------------------------------------------------------|------------------------------------------------------------------------------------------|------------------------------------------------------------------------------------------------|-----------------------|------------------------------------------------------------|-------------------------------------------------------------|
| Muik <sup>38</sup><br>(BA.1) | 1                                                  | 43<br>(25-<br>55)                                 | 780                              | 656 (1<br>FR)                                                                            | 800 (1<br>FR)                                                                            | 156 (5<br>FR)                                                                                  | 14                    | 14;14;13                                                   | 100;100;9<br>3                                              |
| Muik <sup>38</sup><br>(BA.2) | 1                                                  | 39<br>(30-<br>99)                                 | 531                              | 347 (2<br>FR)                                                                            | 545 (1<br>FR)                                                                            | 209 (3<br>FR)                                                                                  | 13                    | 13;13;13                                                   | 100;100;<br>100                                             |
| Khan <sup>36</sup>           | 1                                                  |                                                   | 2038                             | 507 (4<br>FR)                                                                            |                                                                                          | 158 (13<br>FR)                                                                                 | 15                    | 15;nd;15                                                   | 100;nd;<br>100                                              |
| Wang <sup>33</sup><br>(BA.1) | 1                                                  | (14-<br>135)<br>days                              | 9500                             | 2406 (4<br>FR)                                                                           | 2052 (5<br>FR)                                                                           | 473 (20<br>FR)                                                                                 | 13                    | 13;13;13                                                   | 100;100;<br>100                                             |
| Wang <sup>33</sup><br>(BA.2) | 1                                                  | (14-<br>36)<br>days                               | 9527                             | 3054 (3<br>FR)                                                                           | 3679 (3<br>FR)                                                                           | 1627 (6<br>FR)                                                                                 | 12                    | 12;12;12                                                   | 100;100;<br>100                                             |
| Planas <sup>39</sup>         | 1                                                  | 80<br>med<br>days                                 | 1000<br>0                        | 7000 (1<br>FR)                                                                           | 9000 (1<br>FR)                                                                           | 1000<br>(10 R)                                                                                 | 11                    | 11;11;11                                                   | 100;100;<br>100                                             |
| Awasthi <sup>34</sup>        | 2                                                  | >1 mo                                             | 1120                             | 733 (2<br>FR)                                                                            | 380 (3<br>FR)                                                                            | 76 (15<br>FR)                                                                                  | 6                     | 6;6;6                                                      | 100;100;<br>100                                             |
| Yu <sup>40</sup>             | 2                                                  | 14<br>med<br>days                                 | 4046                             | 3249 (1<br>FR)                                                                           | 2448 (2<br>FR)                                                                           |                                                                                                | 8                     | 7;7;nd                                                     | 88;88;nd                                                    |
| Richardson <sup>37</sup>     | 2                                                  | < 9<br>days<br>into<br>hosp.                      | 5484                             | 4244 (1<br>FR)                                                                           | 3779 (1<br>FR)                                                                           | 1984 (3<br>FR)                                                                                 | 9                     | 9;9;9                                                      | 100;100;<br>100                                             |

|                           |   |                 |       |             |             |             |     |             |             |
|---------------------------|---|-----------------|-------|-------------|-------------|-------------|-----|-------------|-------------|
| Tuekprakhon <sup>41</sup> | 2 | 45 med days     | 5861  | 3563 (2 FR) | 2119 (3 FR) | 1064 (6 FR) | 14  | 14;14;14    | 100;100;100 |
| Hachman <sup>42</sup>     | 2 | 29 (2-113) days | 11050 | 1740 (6 FR) | 1910 (6 FR) | 590 (19 FR) | 27  | 27;27;27    | 100;100;100 |
| GM (GMT <sub>50</sub> )   |   |                 | 3578  | 1713 (2 FR) | 1830 (2 FR) | 454 (8 FR)  |     |             |             |
| Total (AVG%)              |   |                 |       |             |             |             | 142 | 141;126;133 | 99;99;99    |

73

74 **Supplementary table 12**

75 Synopsis of *in vitro* studies investigating the efficacy of plasma from (3 dose BNT162b2 plasma) subjects  
 76 against Omicron BA.1, BA.2 and BA.4/5.

| reference                     | Assay type<br>(live virus =1<br>Pseudovirus=<br>2) | time<br>mean<br>or<br>media<br>n<br>(min-<br>max) | WA-1<br>nAb<br>GMT <sub>50</sub> | Omicro<br>n BA.1<br>nAb<br>GMT <sub>50</sub><br><br>(Fold<br>reductio<br>n from<br>WA-1) | Omicro<br>n BA.2<br>nAb<br>GMT <sub>50</sub><br><br>(Fold<br>reductio<br>n from<br>WA-1) | Omicro<br>n<br>BA.14/5<br>nAb<br>GMT <sub>50</sub><br><br>(Fold<br>reductio<br>n from<br>WA-1) | Numb<br>er in<br>study | BA.1;<br>BA.2;<br>BA.4/5<br><br>neutralizin<br>g number | BA.1;<br>BA.2;<br>BA.4/5<br><br>neutralizi<br>ng<br>percent |
|-------------------------------|----------------------------------------------------|---------------------------------------------------|----------------------------------|------------------------------------------------------------------------------------------|------------------------------------------------------------------------------------------|------------------------------------------------------------------------------------------------|------------------------|---------------------------------------------------------|-------------------------------------------------------------|
| Planas <sup>39</sup>          | 1                                                  | 132<br>med<br>days                                | 2000                             | 140 (14<br>FR)                                                                           | 100 (20<br>FR)                                                                           | 50 (40<br>FR)                                                                                  | 22                     | 19;20;19                                                | 86;91;86                                                    |
| Muik <sup>38</sup>            | 1                                                  | 28<br>(26-<br>30)                                 | 549                              | 90 (6<br>FR)                                                                             | 93 (6<br>FR)                                                                             | 37 (15<br>FR)                                                                                  | 18                     | 17;18; 17                                               | 94;100;94                                                   |
| Khan <sup>36</sup>            | 1                                                  |                                                   | 4123                             | 208 (20<br>FR)                                                                           | Not<br>done                                                                              | 211 (20<br>FR)                                                                                 | 18                     | 18;nd;;18                                               | 100;nd;<br>100                                              |
| Wang <sup>33</sup>            | 1                                                  | (14-<br>90)<br>days                               | 6657                             | 130 (5<br>FR)0                                                                           | 1461 (5<br>FR)                                                                           | 347 (19<br>FR)                                                                                 | 16                     | 16;16;14                                                | 100;100;<br>88                                              |
| Qu <sup>35</sup>              | 2                                                  | (21-<br>28)<br>days                               | 2633                             | 976 (3<br>FR)                                                                            | 933 (3<br>FR)                                                                            | 647 (4<br>FR)                                                                                  | 15                     | 14;14;15                                                | 93;93;<br>100                                               |
| Tuekprakho<br>n <sup>41</sup> | 2                                                  | 28<br>days                                        | 4122                             | 1116 (4<br>FR)                                                                           | 1113 (4<br>FR)                                                                           | 360 (11<br>FR)                                                                                 | 19                     | 19;19;19                                                | 100;100;<br>100                                             |
| Hachman <sup>42</sup>         | 2                                                  | 14<br>days                                        | 5783                             | 900 (6<br>FR)                                                                            | 829 (7<br>FR)                                                                            | 275 (21<br>FR)                                                                                 | 27                     | 27;27;27                                                | 100;100;<br>100                                             |
| Yu <sup>40</sup>              | 2                                                  | 14<br>days                                        | 6539                             | 1066 (6<br>FR)                                                                           | 776 (8<br>FR)                                                                            | Not<br>done                                                                                    | 24                     | 24;24                                                   | 100;100;<br>nd                                              |
| GM (GMT <sub>50</sub> )       |                                                    |                                                   | 3247                             | 494 (7<br>FR)                                                                            | 511 (6<br>FR)                                                                            | 189 (16<br>FR)                                                                                 | 1                      |                                                         |                                                             |
| Total<br>(AVG%)               |                                                    |                                                   |                                  |                                                                                          |                                                                                          |                                                                                                | 159                    | 154;138;1<br>29                                         | 97;98;96                                                    |

77

78

79 **Supplementary Figure 1**

80 Alternative graphing of Supplementary table 1 and Figure 2A. 27 *in vitro* studies investigating the efficacy  
 81 of pre-Alpha CCP against Omicron with GMT<sub>50</sub> from each study with minimum and maximum dilution titer  
 82 also shown. The absolute values are graphed in the upper panels for WA-1 on left and omicron on right. In  
 83 the lower panels all numbers divided by the minimum value for each study to normalize for WA-1 on left  
 84 and Omicron on right. The GMT<sub>50</sub> approximates 10 with this computational division. Live virus assays are  
 85 on the left and pseudoviral assays on the right. Individual studies did not report GMT<sub>50</sub> standard deviation.

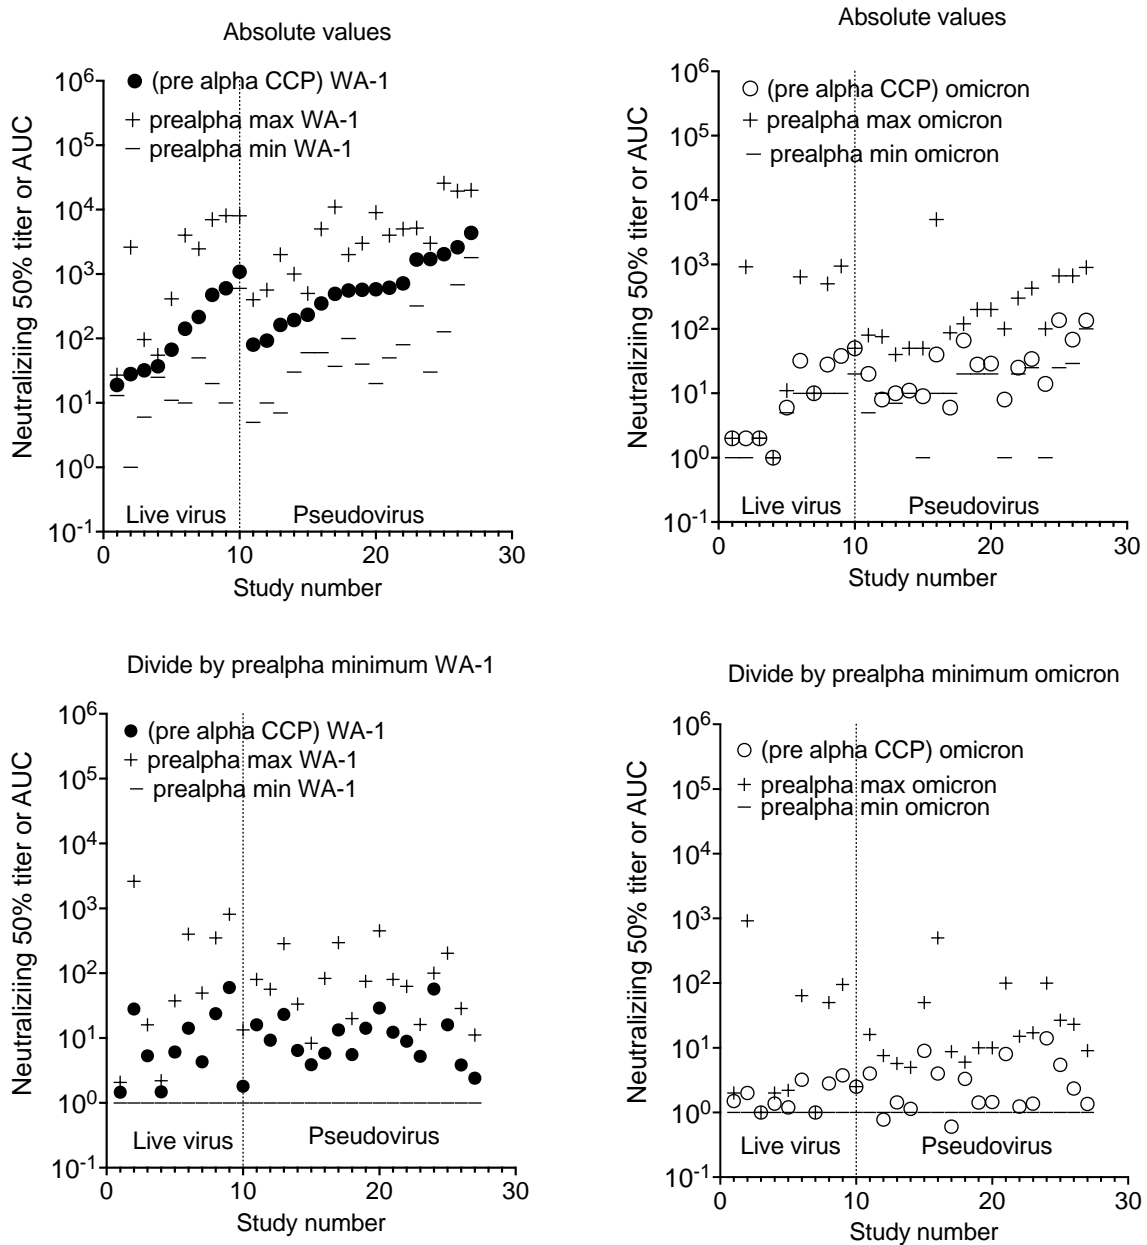

86  
 87  
 88  
 89

90 **Supplementary Figure 2**

91 Alternative graphing of Supplementary table 2 and Figure 2A. 5 *in vitro* studies investigating the efficacy of  
 92 Alpha CCP against Omicron with GMT<sub>50</sub> from each study with minimum and maximum dilution titer also  
 93 shown. The absolute values are graphed in the upper panels for WA-1 on left and omicron on right. In the  
 94 lower panels all numbers divided by the minimum value for each study to normalize for WA-1 on left and  
 95 Omicron on right. The GMT<sub>50</sub> approximates 10 with this computational division. Live virus assays are on  
 96 the left and pseudoviral assays on the right. Individual studies did not report GMT<sub>50</sub> standard deviation.

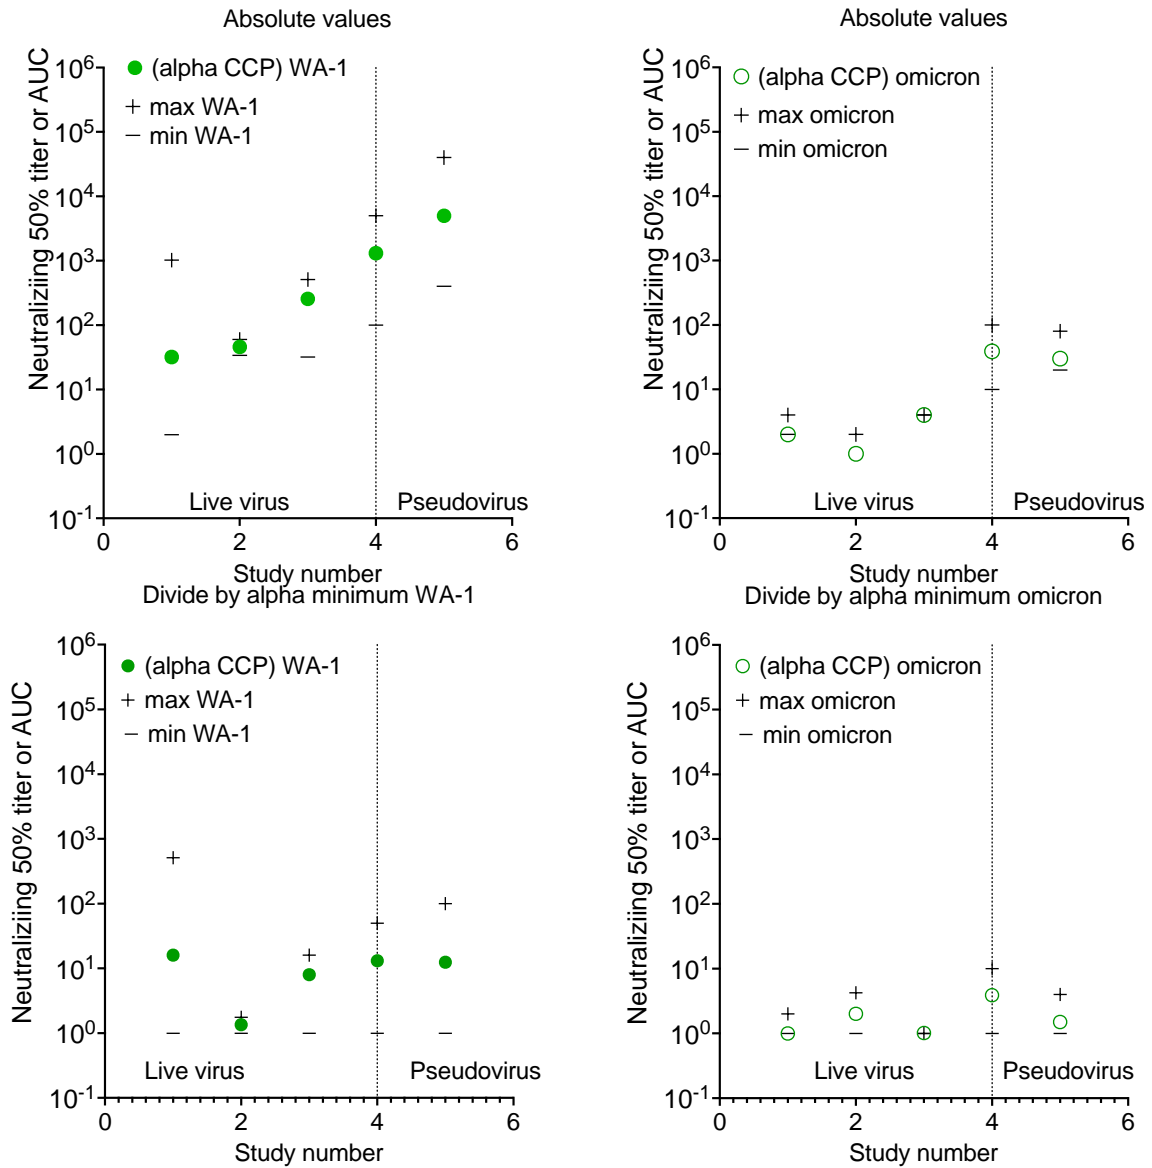

97  
 98  
 99  
 100

101 **Supplementary Figure 3**

102 Alternative graphing of Supplementary table 3 and Figure 2A. 5 *in vitro* studies investigating the efficacy of  
 103 Beta CCP against Omicron with GMT<sub>50</sub> from each study with minimum and maximum dilution titer also  
 104 shown. The absolute values are graphed in the upper panels for WA-1 on left and omicron on right. In the  
 105 lower panels all numbers divided by the minimum value for each study to normalize for WA-1 on left and  
 106 Omicron on right. The GMT<sub>50</sub> approximates 10 with this computational division. Live virus assays are on  
 107 the left and pseudoviral assays on the right. Individual studies did not report GMT<sub>50</sub> standard deviation.

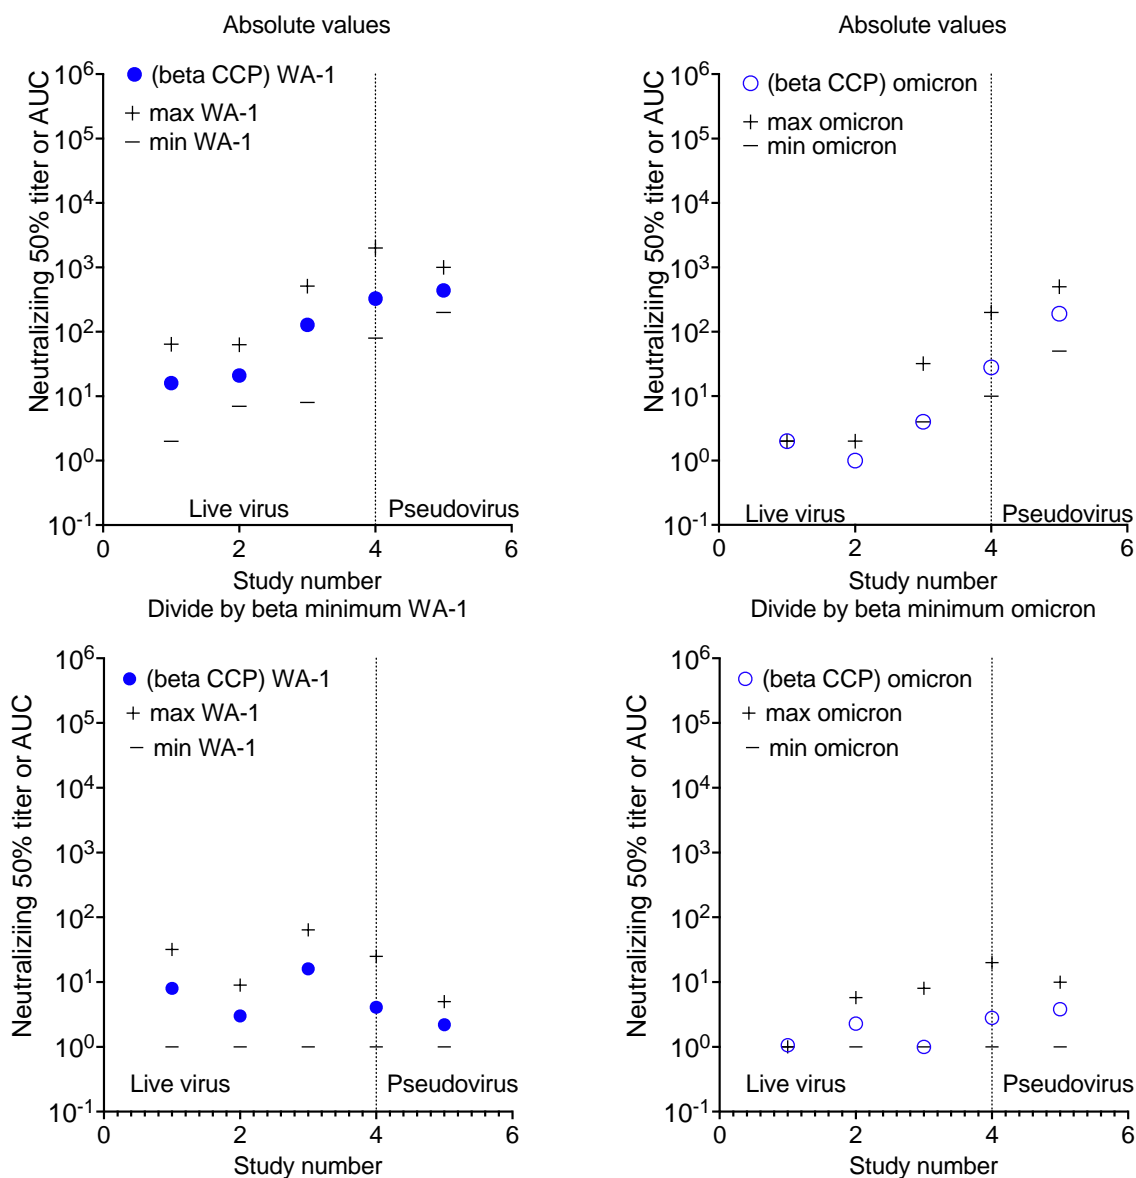

108

109

110 **Supplementary Figure 4**

111 Alternative graphing of Supplementary table 4 and Figure 2A. 7 *in vitro* studies investigating the efficacy of  
 112 Delta CCP against Omicron with GMT<sub>50</sub> from each study with minimum and maximum dilution titer also  
 113 shown. The absolute values are graphed in the upper panels for WA-1 on left and omicron on right. In the  
 114 lower panels all numbers divided by the minimum value for each study to normalize for WA-1 on left and  
 115 Omicron on right. The GMT<sub>50</sub> approximates 10 with this computational division. Live virus assays are on  
 116 the left and pseudoviral assays on the right. Individual studies did not report GMT<sub>50</sub> standard deviation.

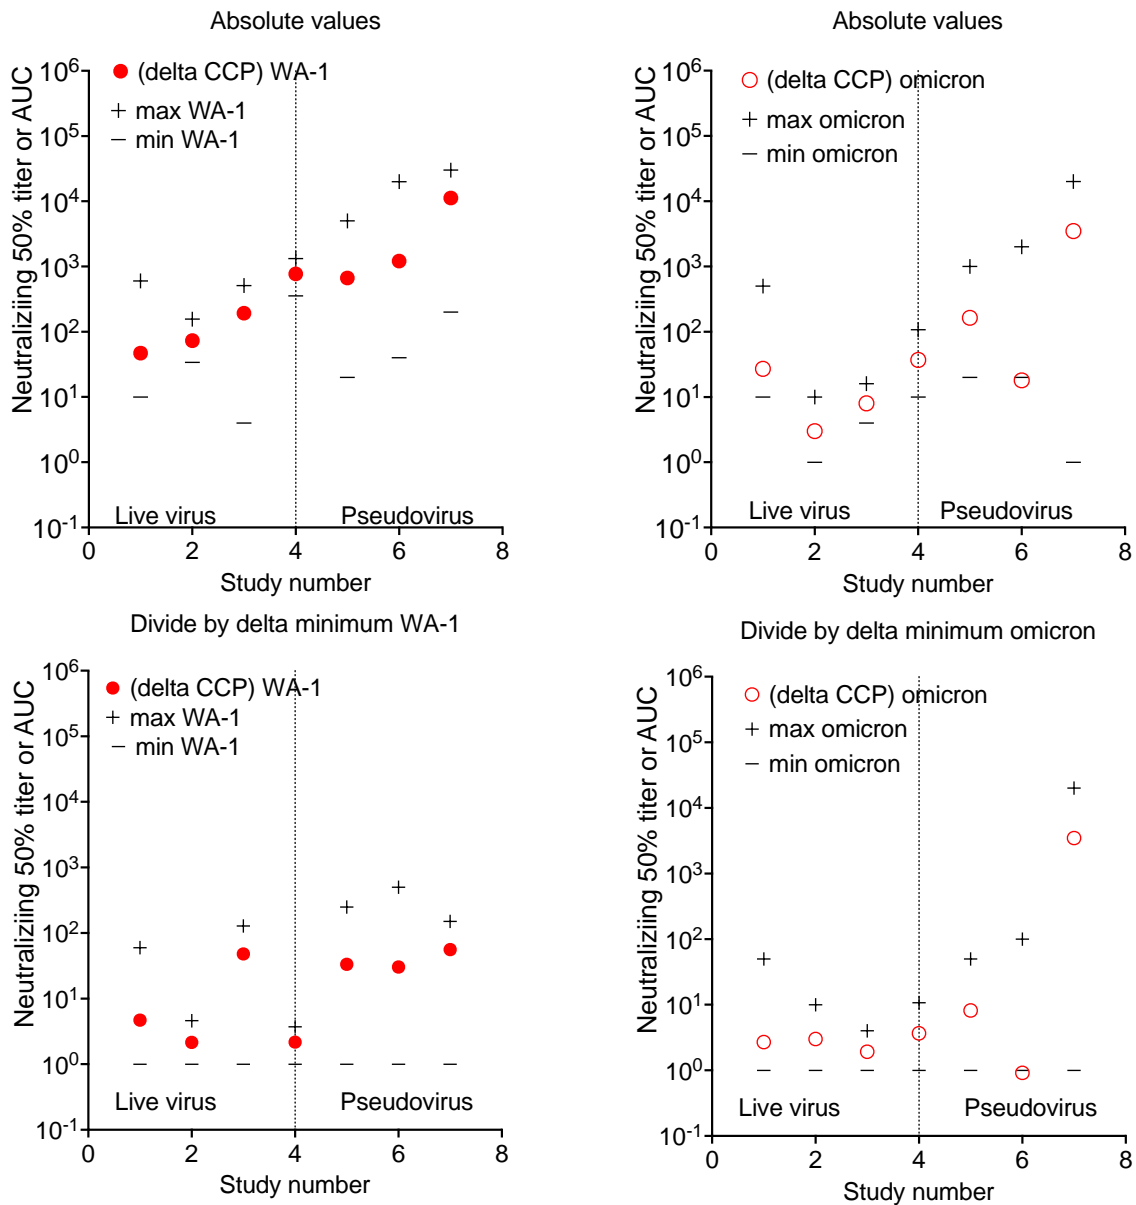

117



118 **Supplementary Figure 5**

119 Alternative graphing of Supplementary table 5 and Figure 2B. 22 *in vitro* studies investigating the efficacy  
 120 of plasma from uninfected recipients of 2 BNT162b2 doses against Omicron with GMT<sub>50</sub> from each study  
 121 with minimum and maximum dilution titer also shown. The absolute values are graphed in the upper panels  
 122 for WA-1 on left and omicron on right. In the lower panels all numbers divided by the minimum value for  
 123 each study to normalize for WA-1 on left and omicron on right. The GMT<sub>50</sub> approximates 10 with this  
 124 computational division. Live virus assays are on the left and pseudoviral assays on the right. Individual  
 125 studies did not report GMT<sub>50</sub> standard deviation.

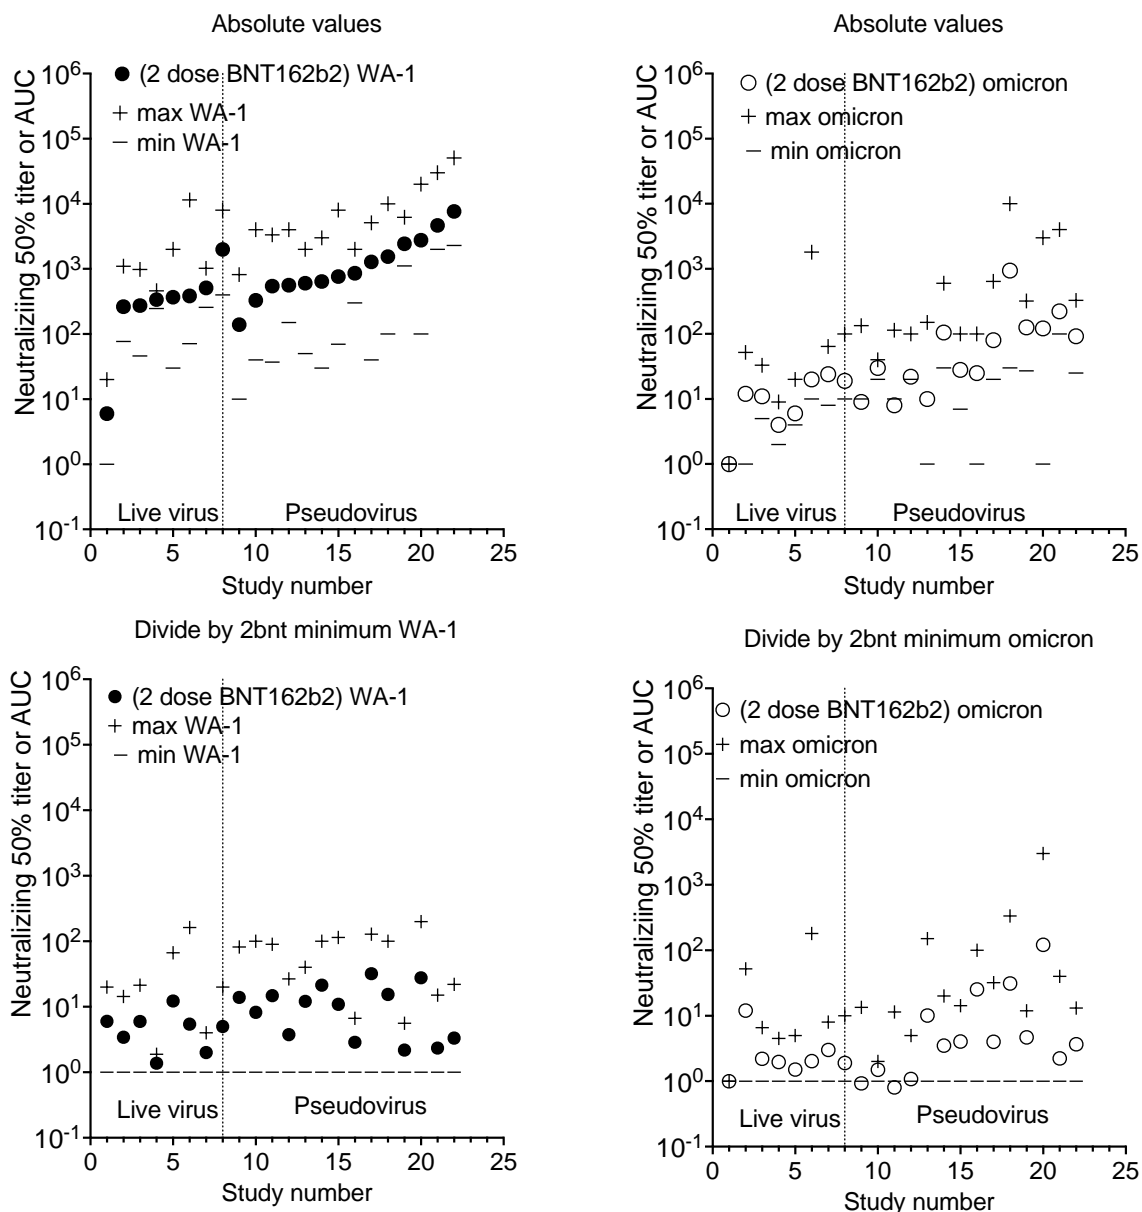

126

127

128

## 130 Supplementary Figure 6

131 Alternative graphing of Supplementary table 6 and Figure 2B. 9 *in vitro* studies investigating the efficacy of  
 132 plasma from uninfected recipients of 2 mRNA-1273 doses against Omicron with GMT<sub>50</sub> from each study  
 133 with minimum and maximum dilution titer also shown. The absolute values are graphed in the upper panels  
 134 for WA-1 on left and omicron on right. In the lower panels all numbers divided by the minimum value for  
 135 each study to normalize for WA-1 on left and omicron on right. The GMT<sub>50</sub> approximates 10 with this  
 136 computational division. Live virus assays on the left and pseudoviral assays on the right. Individual  
 137 studies did not report GMT<sub>50</sub> standard deviation.

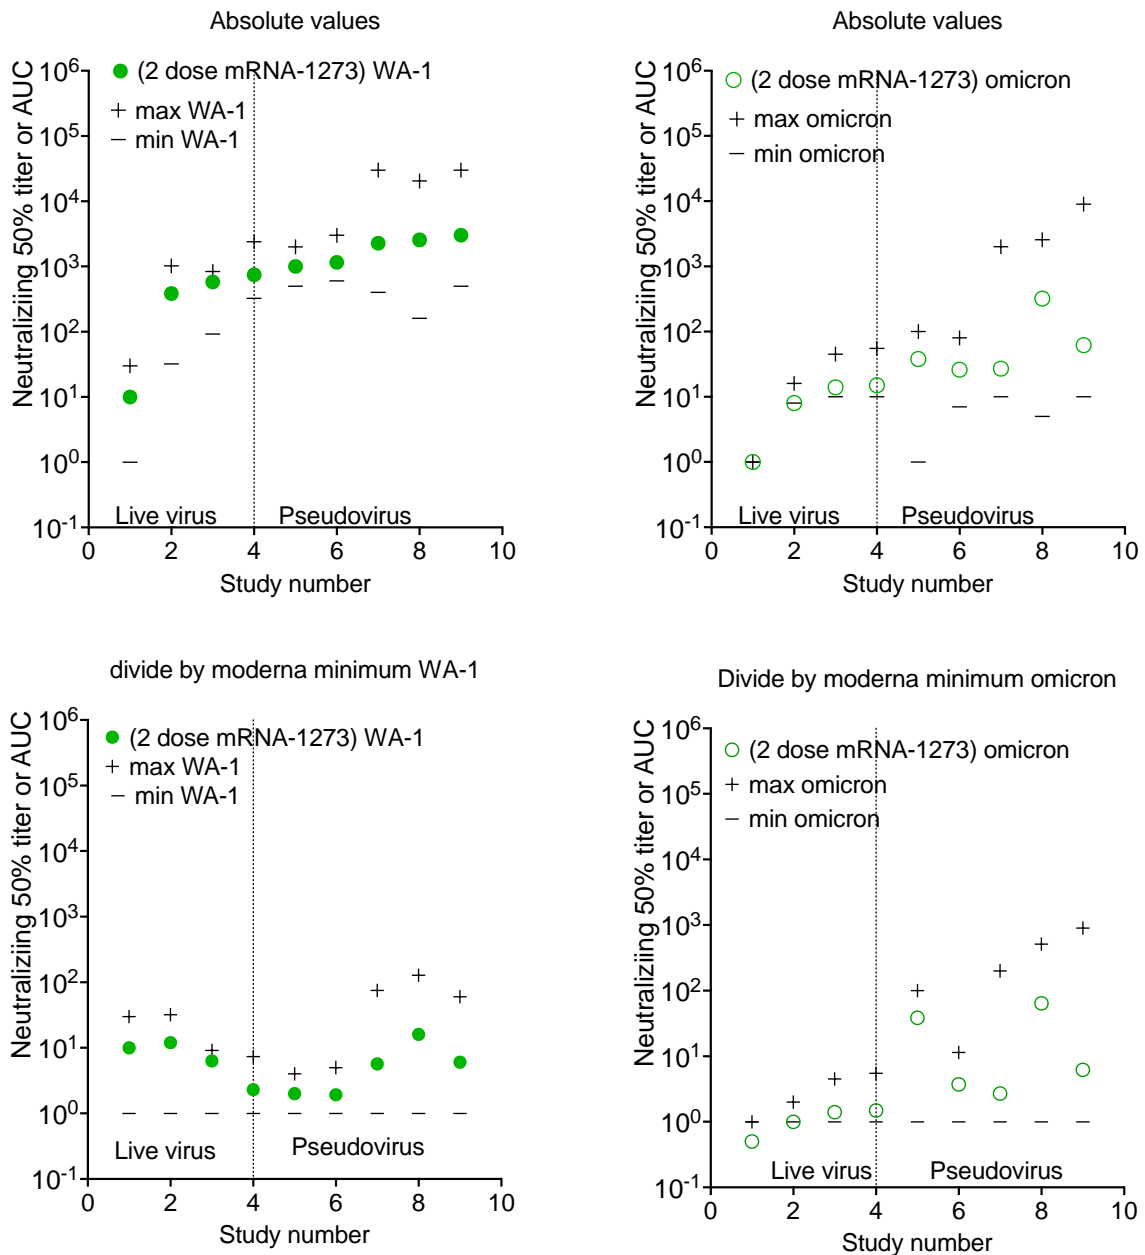

139 **Supplementary Figure 7**

140 Alternative graphing of Supplementary table 7 and Figure 2B. 17 *in vitro* studies investigating the efficacy  
 141 of plasma from infected and vaccinated (2 BNT162b2 doses) subjects (Vax-CCP) against Omicron with  
 142 GMT<sub>50</sub> from each study with minimum and maximum dilution titer also shown. The absolute values are  
 143 graphed in the upper panels for WA-1 on left and omicron on right. In the lower panels all numbers divided  
 144 by the minimum value for each study to normalize for WA-1 on left and Omicron on right. The GMT<sub>50</sub>  
 145 approximates 10 with this computational division. Live virus assays are on the left and pseudoviral assays  
 146 on the right. Individual studies did not report GMT<sub>50</sub> standard deviation.

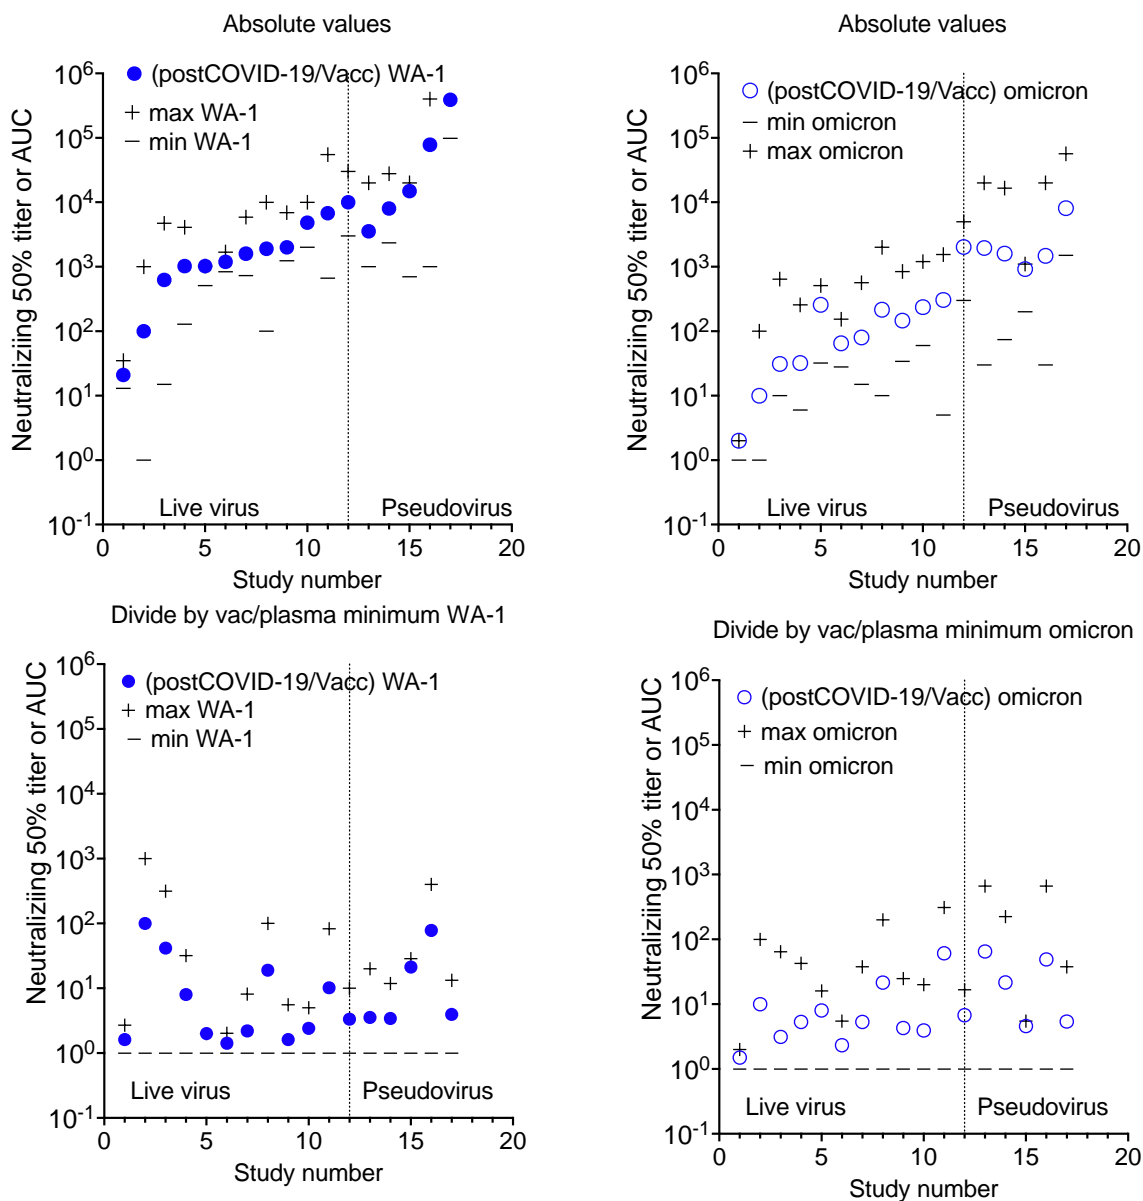

147

148 **Supplementary Figure 8**

149 Alternative graphing of Supplementary table 8 and Figure 2B. 17 *in vitro* studies investigating the efficacy  
 150 of plasma from uninfected subjects vaccinated with 3 BNT162b2 doses against Omicron with GMT<sub>50</sub> from  
 151 each study with minimum and maximum dilution titer also shown. The absolute values are graphed in the  
 152 upper panels for WA-1 on left and omicron on right. In the lower panels all numbers divided by the  
 153 minimum value for each study to normalize for WA-1 on left and Omicron on right. The GMT<sub>50</sub>  
 154 approximates 10 with this computational division. Live virus assays are on the left and pseudoviral assays  
 155 on the right. Individual studies did not report GMT<sub>50</sub> standard deviation.

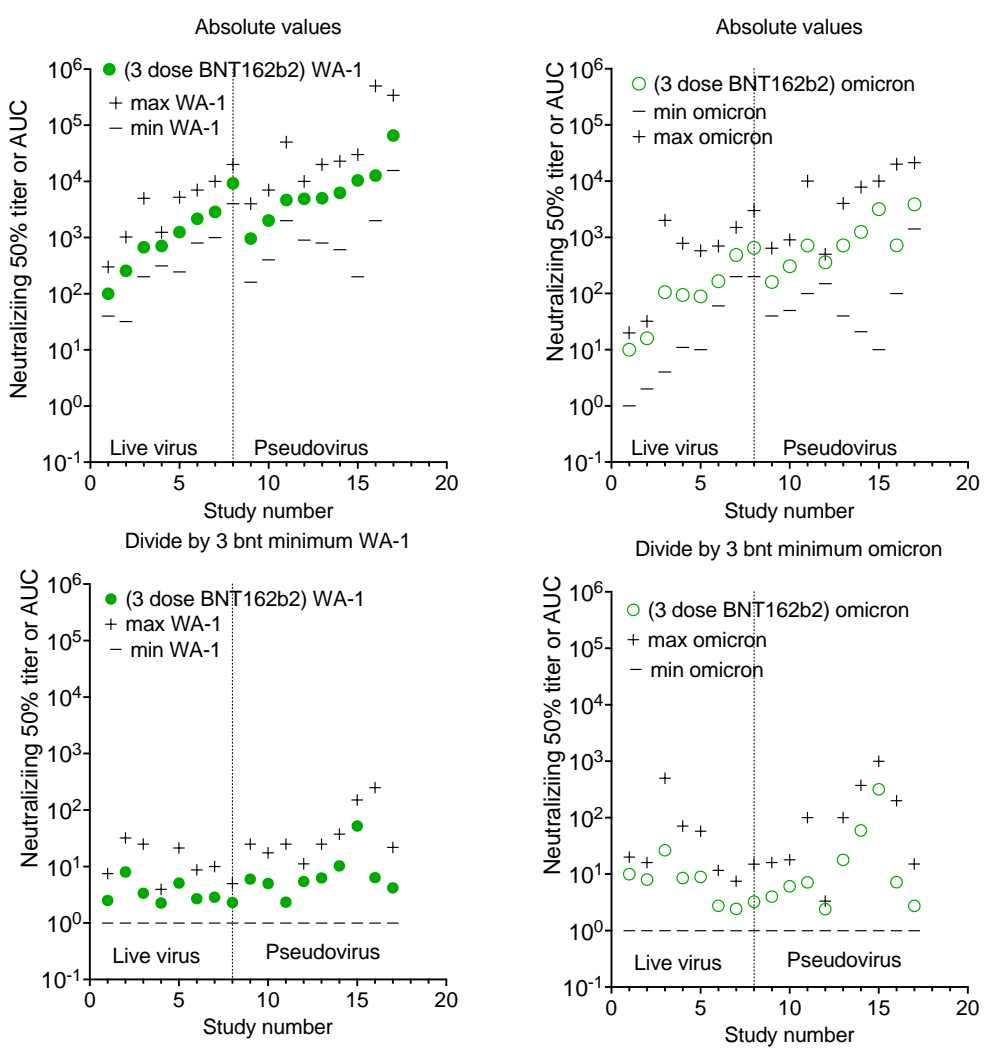

156

157

# Supplementary Figure 9

158

159

160

161

162

163

164

Alternative graphing of Supplementary table 10 and Figure 5. 7 *in vitro* studies investigating the efficacy of plasma from (pre-omicron, BA.1 and BA.4/5 CCP) subjects (Vax-CCP) against Omicron BA.1, BA.2 and BA.4/5 with GMT<sub>50</sub> from each study with minimum and maximum dilution titer also shown. The absolute values are graphed in the upper panels for WA-1 on left and omicron on right. In the lower panels all numbers divided by the minimum value for each study to normalize for WA-1 on left and Omicron on right. The GMT<sub>50</sub> approximates 10 with this computational division. Live virus assays are on the left and pseudoviral assays on the right. Individual studies did not report GMT<sub>50</sub> standard deviation.

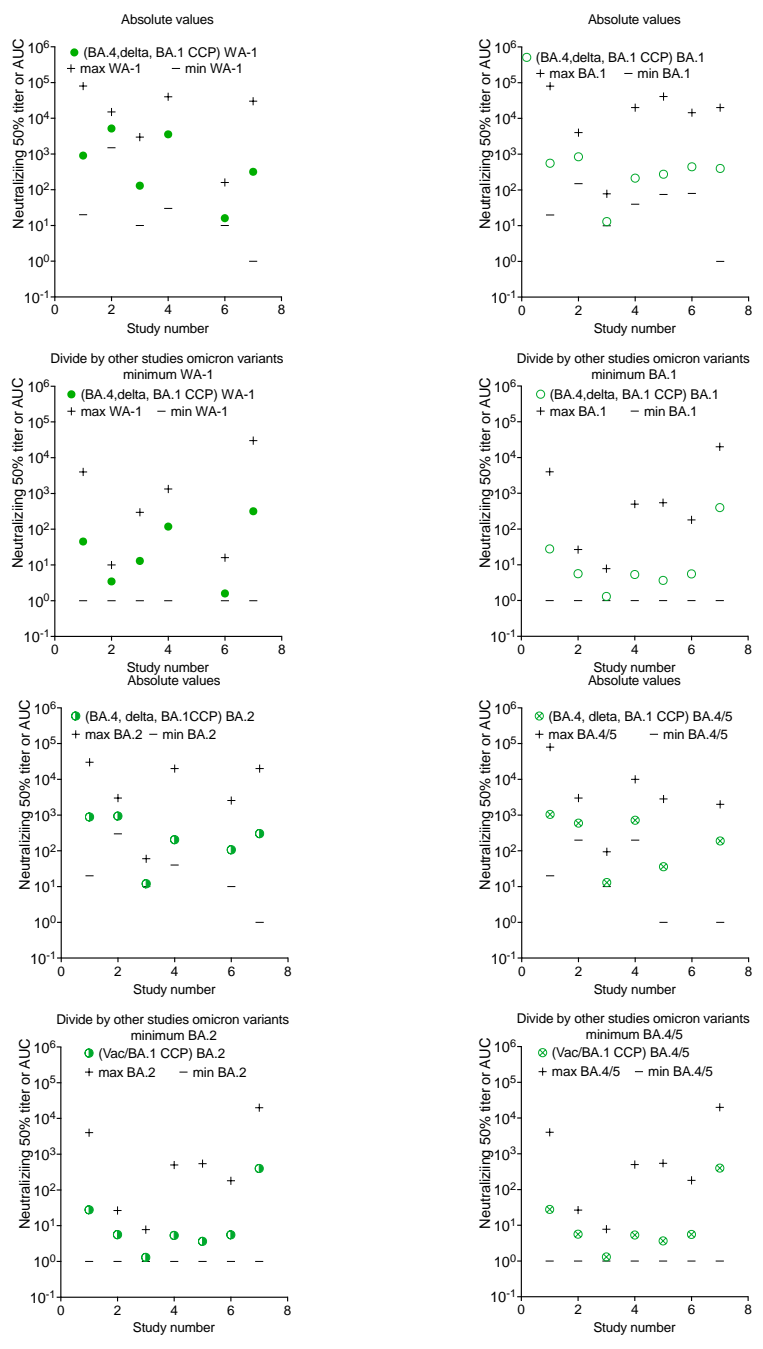

165

166

## Supplementary Figure 10

167

168

169

170

171

172

173

Alternative graphing of Supplement table 11 and Figure 5. 9 *in vitro* studies investigating the efficacy of plasma from (post-COVID-19-BA.1/full vacc plasma) subjects (Vax-CCP) against Omicron BA.1, BA.2 and BA.4/5 with GMT<sub>50</sub> from each study with minimum and maximum dilution titer also shown. The absolute values are graphed in the upper panels for WA-1 on left and omicron on right. In the lower panels all numbers divided by the minimum value for each study to normalize for WA-1 on left and Omicron on right. The GMT<sub>50</sub> approximates 10 with this computational division. Live virus assays are on the left and pseudoviral assays on the right. Individual studies did not report GMT<sub>50</sub> standard deviation.

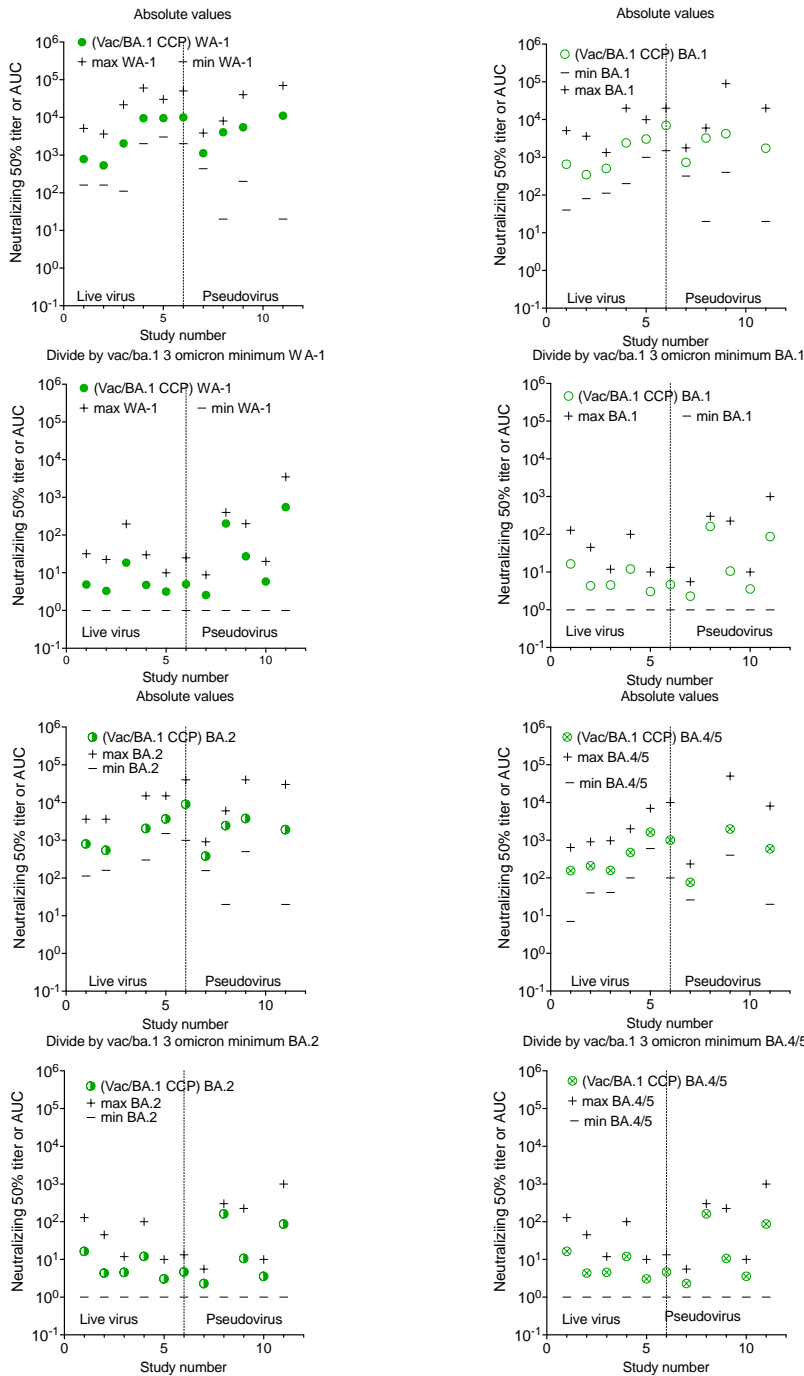

174

175 **Supplementary Figure 11**

176 Alternative graphing of Supplementary table 12 and Figure 5. 8 *in vitro* studies investigating the efficacy of  
 177 plasma from (3 dose BNT162b2 plasma) subjects (Vax-CCP) against Omicron BA.1, BA.2 and BA.4/5 with  
 178 GMT<sub>50</sub> from each study with minimum and maximum dilution titer also shown. The absolute values are  
 179 graphed in the upper panels for WA-1 on left and omicron on right. In the lower panels all numbers divided  
 180 by the minimum value for each study to normalize for WA-1 on left and Omicron on right. The GMT<sub>50</sub>  
 181 approximates 10 with this computational division. Live virus assays are on the left and pseudoviral assays  
 182 on the right. Individual studies did not report GMT<sub>50</sub> standard deviation.

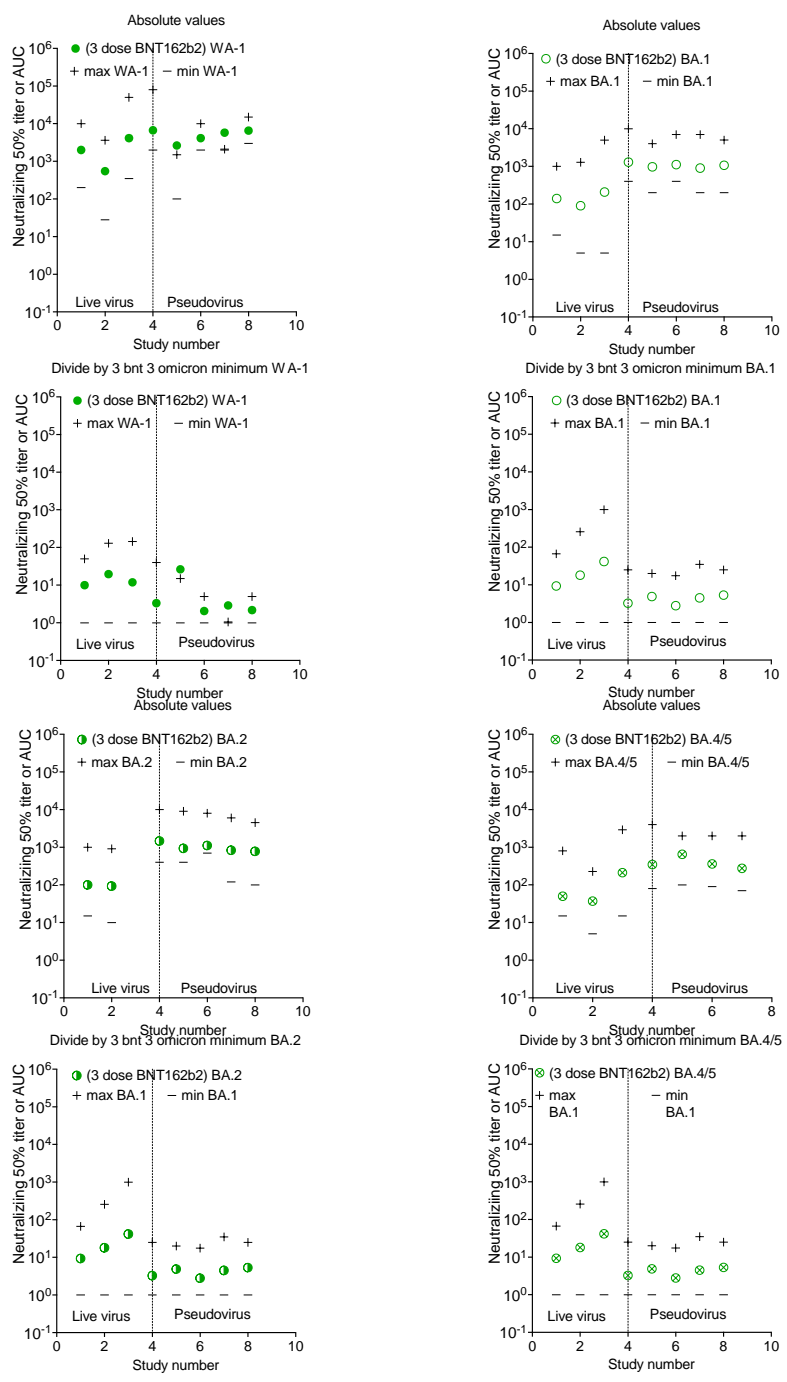

183

185 

## References

- 186 1. Zeng C, *et al.* Neutralization and Stability of SARS-CoV-2 Omicron Variant. *bioRxiv*, (2021).
- 187 2. Liu L, *et al.* Striking antibody evasion manifested by the Omicron variant of SARS-CoV-2. *Nature* **602**,  
188 676-681 (2022).
- 190 3. Schmidt F, *et al.* Plasma Neutralization of the SARS-CoV-2 Omicron Variant. *N Engl J Med* **386**, 599-601  
191 (2022).
- 193 4. Arien KK, *et al.* Three doses of BNT162b2 vaccine confer neutralising antibody capacity against the  
194 SARS-CoV-2 Omicron variant. *NPJ Vaccines* **7**, 35 (2022).
- 196 5. Lusvarghi S, *et al.* SARS-CoV-2 BA.1 variant is neutralized by vaccine booster-elicited serum, but  
197 evades most convalescent serum and therapeutic antibodies. *Sci Transl Med*, eabn8543 (2022).
- 199 6. Hoffmann M, *et al.* The Omicron variant is highly resistant against antibody-mediated neutralization:  
200 Implications for control of the COVID-19 pandemic. *Cell* **185**, 447-456 e411 (2022).
- 202 7. Zou J, *et al.* Neutralization against Omicron SARS-CoV-2 from previous non-Omicron infection. *Nat*  
203 *Commun* **13**, 852 (2022).
- 205 8. Planas D, *et al.* Considerable escape of SARS-CoV-2 Omicron to antibody neutralization. *Nature* **602**,  
206 671-675 (2022).
- 208 9. Zhang L, *et al.* The significant immune escape of pseudotyped SARS-CoV-2 variant Omicron. *Emerg*  
209 *Microbes Infect* **11**, 1-5 (2022).
- 211 10. Gruell H, *et al.* mRNA booster immunization elicits potent neutralizing serum activity against the  
212 SARS-CoV-2 Omicron variant. *Nat Med* **28**, 477-480 (2022).
- 214 11. Dejnirattisai W, *et al.* SARS-CoV-2 Omicron-B.1.1.529 leads to widespread escape from neutralizing  
215 antibody responses. *Cell* **185**, 467-484 e415 (2022).
- 217 12. Sheward DJ, *et al.* Variable loss of antibody potency against SARS-CoV-2 B.1.1.529 (Omicron). *bioRxiv*,  
218 2021.2012.2019.473354 (2021).
- 220 13. Tada T, *et al.* Increased resistance of SARS-CoV-2 Omicron variant to neutralization by vaccine-elicited  
221 and therapeutic antibodies. *EBioMedicine* **78**, 103944 (2022).
- 223



- 224 14. Aggarwal A, *et al.* SARS-CoV-2 Omicron: evasion of potent humoral responses and resistance to  
225 clinical immunotherapeutics relative to viral variants of concern. *medRxiv*, 2021.2012.2014.21267772  
226 (2021).
- 227
- 228 15. Zhao X, *et al.* Effects of a Prolonged Booster Interval on Neutralization of Omicron Variant. *N Engl J*  
229 *Med* **386**, 894-896 (2022).
- 230
- 231 16. Bowen JE, *et al.* Omicron BA.1 and BA.2 neutralizing activity elicited by a comprehensive panel of  
232 human vaccines. *bioRxiv*, (2022).
- 233
- 234 17. Carreno JM, *et al.* Activity of convalescent and vaccine serum against SARS-CoV-2 Omicron. *Nature*  
235 **602**, 682-688 (2022).
- 236
- 237 18. Syed AM, *et al.* Omicron mutations enhance infectivity and reduce antibody neutralization of SARS-  
238 CoV-2 virus-like particles. *medRxiv*, (2022).
- 239
- 240 19. Bekliz M, *et al.* Neutralization of ancestral SARS-CoV-2 and variants Alpha, Beta, Gamma, Delta, Zeta  
241 and Omicron by mRNA vaccination and infection-derived immunity through homologous and  
242 heterologous variants. 2021.2012.2028.21268491 (2021).
- 243
- 244 20. Haveri A, *et al.* Neutralizing antibodies to SARS-CoV-2 Omicron variant after third mRNA vaccination in  
245 health care workers and elderly subjects. *Eur J Immunol*, (2022).
- 246
- 247 21. Li M, *et al.* Convalescent plasma with a high level of virus-specific antibody effectively neutralizes  
248 SARS-CoV-2 variants of concern. *Blood advances*, 2022.2003.2001.22271662 (2022).
- 249
- 250 22. Kurahashi Y, *et al.* Cross-neutralizing activity against Omicron could be obtained in SARS-CoV-2  
251 convalescent patients who received two doses of mRNA vaccination. *medRxiv*,  
252 2022.2002.2024.22271262 (2022).
- 253
- 254 23. Rossler A, Riepler L, Bante D, von Laer D, Kimpel J. SARS-CoV-2 Omicron Variant Neutralization in  
255 Serum from Vaccinated and Convalescent Persons. *N Engl J Med* **386**, 698-700 (2022).
- 256
- 257 24. Lechmere T, *et al.* Broad Neutralization of SARS-CoV-2 Variants, Including Omicron, following  
258 Breakthrough Infection with Delta in COVID-19-Vaccinated Individuals. *mBio* **13**, e0379821 (2022).
- 259
- 260 25. Chatterjee D, *et al.* SARS-CoV-2 Omicron Spike recognition by plasma from individuals receiving  
261 BNT162b2 mRNA vaccination with a 16-week interval between doses. *Cell Rep* **38**, 110429 (2022).
- 262
- 263 26. Edara VV, *et al.* mRNA-1273 and BNT162b2 mRNA vaccines have reduced neutralizing activity against  
264 the SARS-CoV-2 omicron variant. *Cell Rep Med* **3**, 100529 (2022).
- 265
- 266 27. Muik A, *et al.* Neutralization of SARS-CoV-2 Omicron by BNT162b2 mRNA vaccine-elicited human sera.  
267 *Science* **375**, 678-680 (2022).

268  
269 28. Cele S, *et al.* Omicron extensively but incompletely escapes Pfizer BNT162b2 neutralization. *Nature*  
270 **602**, 654-656 (2022).

271  
272 29. Wilhelm A, *et al.* Reduced Neutralization of SARS-CoV-2 Omicron Variant by Vaccine Sera and  
273 Monoclonal Antibodies. *medRxiv*, 2021.2012.2007.21267432 (2021).

274  
275 30. Doria-Rose NA, *et al.* Booster of mRNA-1273 Strengthens SARS-CoV-2 Omicron Neutralization.  
276 *medRxiv*, 2021.2012.2015.21267805 (2021).

277  
278 31. Kawaoka Y, *et al.* Characterization and antiviral susceptibility of SARS-CoV-2 Omicron/BA.2. *Res Sq*,  
279 (2022).

280  
281 32. Dejnirattisai W, *et al.* Reduced neutralisation of SARS-COV-2 Omicron-B.1.1.529 variant by post-  
282 immunisation serum. *Lancet* **399**, 234-236 (2022).

283  
284 33. Wang Q, *et al.* Antibody evasion by SARS-CoV-2 Omicron subvariants BA.2.12.1, BA.4 and BA.5.  
285 *Nature*, (2022).

286  
287 34. Awasthi M, Golding H, Khurana S. SARS-CoV-2 hyperimmune intravenous human immunoglobulins  
288 neutralizes Omicron subvariants BA.1, BA.2, BA.2.12.1, BA.3 and BA.4/BA.5 for treatment of COVID-  
289 19. *Clinical Infectious Diseases*, (2022).

290  
291 35. Qu P, *et al.* Neutralization of the SARS-CoV-2 Omicron BA.4/5 and BA.2.12.1 Subvariants. *N Engl J Med*  
292 **386**, 2526-2528 (2022).

293  
294 36. Khan K, *et al.* Omicron BA.4/BA.5 escape neutralizing immunity elicited by BA.1 infection. *Nat*  
295 *Commun* **13**, 4686 (2022).

296  
297 37. Richardson SI, *et al.* SARS-CoV-2 BA.4 infection triggers more cross-reactive neutralizing antibodies  
298 than BA.1. 2022.2007.2014.500039 (2022).

299  
300 38. Muik A, *et al.* Omicron BA.2 breakthrough infection enhances cross-neutralization of BA.2.12.1 and  
301 BA.4/BA.5. 2022.2008.2002.502461 (2022).

302  
303 39. Planas D, *et al.* Duration of BA.5 neutralization in sera and nasal swabs from SARS-CoV-2 vaccinated  
304 individuals, with or without Omicron breakthrough infection. 2022.2007.2022.22277885 (2022).

305  
306 40. Yu J, *et al.* Comparable Neutralization of the SARS-CoV-2 Omicron BA.1 and BA.2 Variants.  
307 2022.2002.2006.22270533 (2022).

308  
309 41. Tuekprakhon A, *et al.* Antibody escape of SARS-CoV-2 Omicron BA.4 and BA.5 from vaccine and BA.1  
310 serum. *Cell* **185**, 2422-2433.e2413 (2022).

311

312 42. Hachmann NP, *et al.* Neutralization Escape by the SARS-CoV-2 Omicron Variants BA.2.12.1 and  
313 BA.4/BA.5. *N Engl J Med* **387**, 86-88 (2022).

314

315
